# Supplementary material for: Prevalence and Determinants of Rural-Urban Utilization of Skilled Delivery Services in Northern Ghana
Source: Scientifica (Cairo). 2020 May 10;2020:9373476. doi: 10.1155/2020/9373476 (PMC7238325; doi:10.1155/2020/9373476)
Supplement: Supplementary Materials — The Supplementary Materials include the values of the dataset on rural-urban utilization. [file 9373476.f1.xlsx]

## Sheet: Data Set on rural-urban utiliza
Age	Area	Residence	Marriage	Education	Occupation	Religion	Babysex	Parity	ANClastpregnancy	Ifyes	ANCintitiation	UrineExam	BloodExam	Scan	Palpation	MalariaProphylaxis	Healthtalk	Expectationsmet	Placedeliveredyoungestchild	Ifhome	Nodifficulty	NoHealthFac	LongDistance	BadAttitude	CostDelivery	Privacy	MaleStaff	PreffeerdPosition	CulturalBeliefs	FearCesarean	TransportDifficutlites	Ifhomeunplanned	Whoassited	Friendlystaff	Advice	Shorttime	Qualitycare	Facility	Respect	Completemedication	Staffavailability	Cheapservice	Proximity	CostHigh	TransportDiff	Culture	FearCeaser	PositionDeliver	SlowResponse
30	2	1	2	4	2	2	1	2	1	3	2	1	1	2	1	1	1	1	2	2	99	99	99	99	99	99	99	99	99	99	99	99	5	99	99	99	99	99	99	99	99	99	99	1	1	2	1	2	2
23	2	1	2	1	3	2	2	2	1	3	2	1	1	1	1	1	1	1	1	2	99	99	99	99	99	99	99	99	99	99	99	99	1	99	99	99	99	99	99	99	99	99	99	1	1	2	2	2	1
32	2	1	2	1	2	2	2	3	1	3	2	1	1	1	1	1	1	1	4	99	99	99	99	99	99	99	99	99	99	99	99	1	5	99	99	99	99	99	99	99	99	99	99	1	1	2	2	2	2
23	2	1	2	1	1	1	2	2	1	3	2	1	1	1	1	1	1	1	1	2	99	99	99	99	99	99	99	99	99	99	99	99	1	99	99	99	99	99	99	99	99	99	99	1	1	2	2	2	1
33	2	1	2	1	3	1	2	5	1	4	1	1	1	1	1	1	1	1	4	99	99	99	99	99	99	99	99	99	99	99	99	99	2	1	2	2	1	2	2	1	2	1	1	1	1	2	1	2	2
16	2	1	2	1	3	2	2	1	1	4	1	1	1	1	1	1	1	1	1	99	99	99	99	99	99	99	99	99	99	99	99	99	3	99	99	99	99	99	99	99	99	99	99	1	1	2	2	2	2
25	2	1	2	5	4	2	2	3	1	4	1	1	1	1	2	1	1	1	2	99	99	99	99	99	99	99	99	99	99	99	99	99	3	99	99	99	99	99	99	99	99	99	99	1	1	2	2	2	2
16	2	1	2	1	3	1	2	1	1	4	1	1	2	1	1	1	1	1	4	99	99	99	99	99	99	99	99	99	99	99	99	99	3	99	99	99	99	99	99	99	99	99	99	1	1	2	2	2	2
16	2	1	2	1	2	2	2	1	1	4	1	1	1	1	1	1	1	1	1	99	99	99	99	99	99	99	99	99	99	99	99	99	3	99	99	99	99	99	99	99	99	99	99	1	1	2	2	2	2
42	2	1	1	3	3	1	2	8	1	4	1	1	1	1	1	1	1	1	4	99	99	99	99	99	99	99	99	99	99	99	99	99	2	99	99	99	99	99	99	99	99	99	99	1	1	2	2	2	1
33	2	1	2	1	1	2	2	5	1	4	1	1	1	1	1	1	1	1	4	99	99	99	99	99	99	99	99	99	99	99	99	99	2	1	2	2	1	2	2	1	2	1	1	1	1	2	1	2	2
16	2	1	2	4	1	2	2	1	1	4	1	1	1	2	1	1	1	1	1	99	99	99	99	99	99	99	99	99	99	99	99	99	3	99	99	99	99	99	99	99	99	99	99	1	1	2	2	2	2
23	2	1	1	1	3	1	2	2	1	4	1	1	1	1	1	1	1	2	1	2	99	99	99	99	99	99	99	99	99	99	99	1	3	99	99	99	99	99	99	99	99	99	99	1	1	2	2	2	2
23	2	1	2	1	3	2	2	2	1	4	1	1	1	1	2	1	1	2	4	99	99	99	99	99	99	99	99	99	99	99	99	1	3	99	99	99	99	99	99	99	99	99	99	1	1	2	2	2	2
34	2	1	1	1	2	2	2	5	1	4	1	1	1	1	1	1	1	2	4	99	99	99	99	99	99	99	99	99	99	99	99	99	2	1	1	2	1	2	2	1	2	2	1	1	1	2	2	2	2
16	2	1	2	2	3	1	2	1	1	4	2	1	1	2	2	1	1	1	1	99	99	99	99	99	99	99	99	99	99	99	99	99	3	99	99	99	99	99	99	99	99	99	99	1	1	2	2	2	2
16	2	1	2	1	3	1	2	1	1	4	2	1	1	2	1	1	1	1	1	99	99	99	99	99	99	99	99	99	99	99	99	99	3	99	99	99	99	99	99	99	99	99	99	1	1	2	2	2	2
16	2	1	2	4	3	1	2	1	1	4	2	1	1	2	2	1	1	1	4	99	99	99	99	99	99	99	99	99	99	99	99	99	3	99	99	99	99	99	99	99	99	99	99	1	1	2	2	2	2
16	2	1	2	4	3	1	2	1	1	4	2	1	1	2	2	1	1	1	4	99	99	99	99	99	99	99	99	99	99	99	99	99	3	99	99	99	99	99	99	99	99	99	99	1	1	2	2	2	2
16	2	1	2	1	2	1	2	1	1	4	2	1	1	2	1	1	1	1	1	99	99	99	99	99	99	99	99	99	99	99	99	99	3	99	99	99	99	99	99	99	99	99	99	1	1	2	2	2	2
25	2	1	2	1	3	1	2	3	1	4	2	1	1	2	1	1	1	1	4	99	99	99	99	99	99	99	99	99	99	99	99	99	3	99	99	99	99	99	99	99	99	99	99	1	1	2	2	2	2
16	2	1	2	1	2	1	2	1	1	4	2	1	1	2	1	1	1	1	4	99	99	99	99	99	99	99	99	99	99	99	99	99	3	99	99	99	99	99	99	99	99	99	99	1	1	2	2	2	2
28	2	1	2	3	3	2	2	2	1	4	2	1	1	2	1	1	1	2	4	99	99	99	99	99	99	99	99	99	99	99	99	99	3	99	99	99	99	99	99	99	99	99	99	1	1	2	2	1	2
16	2	1	2	1	3	1	2	1	1	4	2	1	1	2	1	1	1	1	1	99	99	99	99	99	99	99	99	99	99	99	99	99	3	99	99	99	99	99	99	99	99	99	99	1	1	2	2	2	2
28	2	1	2	4	3	1	2	2	1	4	2	1	1	2	1	1	1	2	4	99	99	99	99	99	99	99	99	99	99	99	99	99	3	99	99	99	99	99	99	99	99	99	99	1	1	2	2	1	2
42	2	1	2	5	3	2	2	8	1	4	5	1	1	2	1	1	1	1	4	99	99	99	99	99	99	99	99	99	99	99	99	99	2	99	99	99	99	99	99	99	99	99	99	1	1	2	2	2	1
34	2	1	2	4	2	2	1	3	1	5	1	1	1	2	1	1	1	1	4	99	99	99	99	99	99	99	99	99	99	99	99	99	2	1	2	2	1	2	2	1	2	2	1	1	1	2	2	2	2
36	2	1	2	3	3	1	1	3	1	5	1	1	1	1	1	1	1	1	4	99	99	99	99	99	99	99	99	99	99	99	99	99	2	1	2	2	1	2	2	1	2	2	1	1	1	2	1	1	1
29	2	1	2	4	1	2	2	2	1	5	1	1	1	1	1	1	1	1	4	99	99	99	99	99	99	99	99	99	99	99	99	99	2	1	2	2	1	2	2	1	2	2	1	1	1	2	2	1	2
20	2	1	2	1	3	1	2	1	1	5	1	1	1	2	1	1	1	1	4	99	99	99	99	99	99	99	99	99	99	99	99	99	2	1	2	2	1	2	2	1	1	2	1	1	1	2	2	2	2
34	2	1	2	4	3	1	1	3	1	5	1	1	1	1	2	1	1	1	4	99	99	99	99	99	99	99	99	99	99	99	99	99	2	1	2	2	1	2	2	1	2	2	1	1	1	2	2	2	2
36	2	1	2	1	3	2	1	3	1	5	1	1	1	1	2	1	1	1	4	99	99	99	99	99	99	99	99	99	99	99	99	99	2	1	2	2	1	2	2	1	2	2	1	1	1	2	1	1	1
29	2	1	2	3	1	1	2	2	1	5	1	1	1	1	1	1	1	1	4	99	99	99	99	99	99	99	99	99	99	99	99	99	2	1	2	2	1	2	2	1	2	2	1	1	1	2	2	1	2
20	2	1	2	1	3	2	2	1	1	6	1	1	1	2	1	1	1	1	4	99	99	99	99	99	99	99	99	99	99	99	99	99	2	1	2	2	1	2	2	1	1	2	1	1	1	2	2	2	2
34	2	1	2	1	3	1	1	3	1	6	1	1	1	2	1	1	1	1	4	99	99	99	99	99	99	99	99	99	99	99	99	99	2	1	2	2	1	2	2	1	2	2	1	1	1	2	2	2	2
36	2	1	2	1	3	1	1	3	1	6	1	1	1	1	2	1	1	1	4	99	99	99	99	99	99	99	99	99	99	99	99	99	2	1	2	2	1	2	2	1	2	2	1	1	1	2	1	1	1
20	2	1	2	1	3	1	2	1	1	6	1	1	1	1	1	1	1	2	4	99	99	99	99	99	99	99	99	99	99	99	99	99	2	1	2	2	1	2	2	1	1	2	1	1	1	2	2	2	2
20	2	1	2	5	3	1	2	1	1	6	1	1	1	1	1	1	1	1	4	99	99	99	99	99	99	99	99	99	99	99	99	99	2	1	2	2	1	2	2	1	1	2	1	1	1	2	2	2	2
34	2	1	2	1	3	1	1	3	1	6	1	1	1	1	2	1	1	2	4	99	99	99	99	99	99	99	99	99	99	99	99	99	2	1	2	2	1	2	2	1	2	2	1	1	1	2	2	2	2
36	2	1	2	1	3	2	1	3	1	6	1	1	1	1	1	2	1	1	4	99	99	99	99	99	99	99	99	99	99	99	99	99	2	1	2	2	1	2	2	1	2	2	1	1	1	2	1	1	1
19	2	1	2	1	3	1	2	1	1	6	1	1	1	1	1	1	1	1	4	99	99	99	99	99	99	99	99	99	99	99	99	99	2	1	2	2	1	2	2	1	1	2	1	1	1	2	2	2	2
23	2	1	2	3	1	3	2	2	1	1	1	1	1	2	1	1	1	2	1	2	99	99	99	99	99	99	99	99	99	99	99	1	3	99	99	99	99	99	99	99	99	99	99	1	1	2	2	2	2
23	2	1	2	1	2	2	2	2	1	1	1	1	1	2	1	1	1	2	1	2	99	99	99	99	99	99	99	99	99	99	99	1	3	99	99	99	99	99	99	99	99	99	99	1	1	2	2	2	2
32	2	1	2	1	3	1	2	4	1	2	1	1	1	2	1	2	1	1	4	99	99	99	99	99	99	99	99	99	99	99	99	99	2	1	2	2	2	1	2	1	2	1	1	1	1	2	2	2	1
18	2	1	2	1	3	2	2	1	1	2	1	2	1	2	1	2	1	1	2	2	99	99	99	99	99	99	99	99	99	99	99	1	5	99	99	99	99	99	99	99	99	99	99	1	1	2	1	1	1
24	2	1	2	1	3	2	1	1	1	2	1	1	1	2	2	1	1	1	1	2	99	99	99	99	99	99	99	99	99	99	99	1	3	99	99	99	99	99	99	99	99	99	99	1	1	2	1	2	2
32	2	1	2	5	4	1	2	4	1	2	1	1	1	2	1	2	1	1	4	99	99	99	99	99	99	99	99	99	99	99	99	99	2	1	2	2	2	1	2	1	2	1	1	1	1	2	2	2	1
18	2	1	2	4	3	1	2	1	1	2	1	2	1	2	1	2	1	1	2	2	99	99	99	99	99	99	99	99	99	99	99	1	5	99	99	99	99	99	99	99	99	99	99	1	1	2	1	1	1
24	2	1	2	3	3	1	1	1	1	2	1	1	1	2	2	1	1	1	1	2	99	99	99	99	99	99	99	99	99	99	99	1	3	99	99	99	99	99	99	99	99	99	99	1	1	2	1	2	2
26	2	1	2	1	3	1	2	1	1	2	1	1	1	2	1	1	1	1	2	2	99	99	99	99	99	99	99	99	99	99	99	1	3	99	99	99	99	99	99	99	99	99	99	2	1	1	2	2	2
33	2	1	2	1	2	2	2	5	1	2	1	1	1	2	1	2	1	1	4	99	99	99	99	99	99	99	99	99	99	99	99	99	2	1	2	2	1	2	2	1	2	1	1	1	1	2	1	2	2
24	2	1	1	1	3	1	1	1	1	2	1	1	1	2	2	1	1	1	1	2	99	99	99	99	99	99	99	99	99	99	99	1	3	99	99	99	99	99	99	99	99	99	99	1	1	2	1	2	2
26	2	1	2	5	4	1	2	1	1	2	1	1	1	2	1	1	1	1	2	2	99	99	99	99	99	99	99	99	99	99	99	1	3	99	99	99	99	99	99	99	99	99	99	2	1	1	2	2	2
33	2	1	2	1	2	1	2	5	1	2	1	1	1	2	1	2	1	1	4	99	99	99	99	99	99	99	99	99	99	99	99	99	2	1	2	2	1	2	2	1	2	1	1	1	1	2	1	2	2
24	2	1	2	1	3	2	1	1	1	2	1	1	1	2	2	1	1	1	1	2	99	99	99	99	99	99	99	99	99	99	99	1	3	99	99	99	99	99	99	99	99	99	99	1	1	2	1	2	2
24	2	1	2	1	3	1	1	1	1	2	1	1	1	2	2	1	1	1	1	2	99	99	99	99	99	99	99	99	99	99	99	1	3	99	99	99	99	99	99	99	99	99	99	1	1	2	1	2	2
33	2	1	2	1	3	1	2	5	1	2	1	1	1	2	1	2	1	1	4	99	99	99	99	99	99	99	99	99	99	99	99	99	2	1	2	2	1	2	2	1	2	1	1	1	1	2	1	2	2
24	2	1	1	5	4	2	1	1	1	2	1	1	1	2	2	1	1	1	1	2	99	99	99	99	99	99	99	99	99	99	99	1	3	99	99	99	99	99	99	99	99	99	99	1	1	2	1	2	2
26	2	1	2	1	3	2	2	1	1	2	1	1	1	2	1	1	1	1	2	2	99	99	99	99	99	99	99	99	99	99	99	1	3	99	99	99	99	99	99	99	99	99	99	2	1	1	2	2	2
33	2	1	2	5	3	2	2	5	1	2	1	1	1	2	1	2	1	1	4	99	99	99	99	99	99	99	99	99	99	99	99	99	2	1	2	2	1	2	2	1	2	1	1	1	1	2	1	2	2
24	2	1	2	1	3	1	1	1	1	2	1	1	1	2	2	1	1	1	1	2	99	99	99	99	99	99	99	99	99	99	99	1	3	99	99	99	99	99	99	99	99	99	99	1	1	2	1	2	2
33	2	1	2	1	3	1	2	5	1	2	1	1	1	2	1	2	1	1	4	99	99	99	99	99	99	99	99	99	99	99	99	99	2	1	2	2	1	2	2	1	2	1	1	1	1	2	1	2	2
33	2	1	2	1	3	2	2	5	1	2	1	1	1	2	1	2	1	1	4	99	99	99	99	99	99	99	99	99	99	99	99	99	2	1	2	2	1	2	2	1	2	1	1	1	1	2	1	2	2
18	2	1	2	3	3	1	2	1	1	2	2	2	1	2	1	2	1	1	2	2	99	99	99	99	99	99	99	99	99	99	99	1	5	99	99	99	99	99	99	99	99	99	99	1	1	2	1	1	1
32	2	1	2	1	3	1	2	4	1	2	2	1	1	2	2	2	1	1	4	99	99	99	99	99	99	99	99	99	99	99	99	99	2	1	2	2	2	1	2	1	2	1	1	1	1	2	2	2	1
26	2	1	2	3	3	2	2	1	1	2	2	1	1	2	1	1	1	1	2	2	99	99	99	99	99	99	99	99	99	99	99	1	3	99	99	99	99	99	99	99	99	99	99	2	1	1	2	2	2
18	2	1	2	3	3	1	2	1	1	2	2	2	1	2	1	2	1	1	2	2	99	99	99	99	99	99	99	99	99	99	99	1	5	99	99	99	99	99	99	99	99	99	99	1	1	2	1	1	1
26	2	1	2	1	3	1	2	1	1	2	2	1	1	2	1	1	1	1	2	2	99	99	99	99	99	99	99	99	99	99	99	1	3	99	99	99	99	99	99	99	99	99	99	2	1	1	2	2	2
32	2	1	2	1	2	1	2	4	1	2	2	1	1	2	1	2	1	1	4	99	99	99	99	99	99	99	99	99	99	99	99	99	2	1	2	2	2	1	2	1	2	1	1	1	1	2	2	2	1
18	2	1	2	1	3	2	2	1	1	2	2	2	1	2	1	2	1	1	2	2	99	99	99	99	99	99	99	99	99	99	99	1	5	99	99	99	99	99	99	99	99	99	99	1	1	2	1	1	1
32	2	1	2	1	3	2	2	4	1	2	2	1	1	2	1	2	1	1	4	99	99	99	99	99	99	99	99	99	99	99	99	99	2	1	2	2	2	1	2	1	2	1	1	1	1	2	2	2	1
18	2	1	2	1	2	1	2	1	1	2	2	2	1	2	2	2	1	1	2	2	99	99	99	99	99	99	99	99	99	99	99	1	5	99	99	99	99	99	99	99	99	99	99	1	1	2	1	1	1
26	2	1	2	1	2	1	2	1	1	2	2	1	1	2	1	1	1	1	2	2	99	99	99	99	99	99	99	99	99	99	99	1	3	99	99	99	99	99	99	99	99	99	99	2	1	1	2	2	2
32	2	1	2	1	2	1	2	4	1	2	2	1	1	2	1	2	1	1	4	99	99	99	99	99	99	99	99	99	99	99	99	99	2	1	2	2	2	1	2	1	2	1	1	1	1	2	2	2	1
18	2	1	2	4	3	2	2	1	1	2	2	2	1	2	1	2	1	1	2	2	99	99	99	99	99	99	99	99	99	99	99	1	5	99	99	99	99	99	99	99	99	99	99	1	1	2	1	1	1
24	2	1	2	4	3	2	1	1	1	2	2	1	1	2	2	1	1	1	1	2	99	99	99	99	99	99	99	99	99	99	99	1	3	99	99	99	99	99	99	99	99	99	99	1	1	2	1	2	2
26	2	1	2	1	2	2	2	1	1	2	2	1	1	2	1	1	1	1	2	2	99	99	99	99	99	99	99	99	99	99	99	1	3	99	99	99	99	99	99	99	99	99	99	2	1	1	2	2	2
32	2	1	2	1	2	2	2	4	1	2	2	1	1	2	1	2	1	1	4	99	99	99	99	99	99	99	99	99	99	99	99	99	2	1	2	2	2	1	2	1	2	1	1	1	1	2	2	2	1
18	2	1	2	1	2	3	2	1	1	2	2	2	1	2	1	2	1	1	2	2	99	99	99	99	99	99	99	99	99	99	99	1	5	99	99	99	99	99	99	99	99	99	99	1	1	2	1	1	1
26	2	1	2	1	3	1	2	1	1	2	2	1	1	2	1	1	1	1	2	2	99	99	99	99	99	99	99	99	99	99	99	1	3	99	99	99	99	99	99	99	99	99	99	2	1	1	2	2	2
32	2	1	2	1	3	2	2	4	1	2	2	1	1	2	1	2	1	1	4	99	99	99	99	99	99	99	99	99	99	99	99	99	2	1	2	2	2	1	2	1	2	1	1	1	1	2	2	2	1
24	2	1	2	3	2	1	1	1	1	2	3	1	1	2	2	1	1	1	1	2	99	99	99	99	99	99	99	99	99	99	99	1	3	99	99	99	99	99	99	99	99	99	99	1	1	2	1	2	2
24	2	1	2	1	2	1	1	1	1	2	3	1	1	2	2	1	1	1	1	2	99	99	99	99	99	99	99	99	99	99	99	1	3	99	99	99	99	99	99	99	99	99	99	1	1	2	1	2	2
34	2	1	2	3	3	2	2	5	1	3	1	1	1	2	1	2	1	2	4	99	99	99	99	99	99	99	99	99	99	99	99	99	2	1	1	2	1	2	2	1	2	2	1	1	1	2	2	2	2
36	2	1	2	1	3	2	2	4	1	3	1	1	1	2	1	1	1	2	4	99	99	99	99	99	99	99	99	99	99	99	99	99	2	1	2	2	2	1	2	1	2	2	1	1	1	2	2	2	2
30	2	1	2	1	3	1	1	2	1	3	1	1	1	2	1	2	1	1	2	2	99	99	99	99	99	99	99	99	99	99	99	99	5	99	99	99	99	99	99	99	99	99	99	1	1	2	1	2	2
32	2	1	1	1	2	1	2	3	1	3	1	1	1	2	2	1	1	1	2	2	99	99	99	99	99	99	99	99	99	99	99	1	5	99	99	99	99	99	99	99	99	99	99	1	1	2	2	2	2
23	2	1	2	1	3	2	2	2	1	3	1	1	1	2	1	1	1	1	1	2	99	99	99	99	99	99	99	99	99	99	99	99	1	99	99	99	99	99	99	99	99	99	99	1	1	2	2	2	1
34	2	1	2	5	4	1	2	5	1	3	1	1	1	2	2	2	1	2	4	99	99	99	99	99	99	99	99	99	99	99	99	99	2	1	1	2	1	2	2	1	2	2	1	1	1	2	2	2	2
36	2	1	4	1	3	1	2	4	1	3	1	1	1	2	1	1	1	2	4	99	99	99	99	99	99	99	99	99	99	99	99	99	2	1	2	2	2	1	2	1	2	2	1	1	1	2	2	2	2
30	2	1	2	1	3	2	1	2	1	3	1	1	1	2	2	2	1	1	2	2	99	99	99	99	99	99	99	99	99	99	99	99	5	99	99	99	99	99	99	99	99	99	99	1	1	2	1	2	2
32	2	1	2	1	3	1	2	3	1	3	1	1	1	2	2	1	1	1	2	2	99	99	99	99	99	99	99	99	99	99	99	1	5	99	99	99	99	99	99	99	99	99	99	1	1	2	2	2	2
23	2	1	2	1	3	1	2	2	1	3	1	1	1	2	1	1	1	1	1	2	99	99	99	99	99	99	99	99	99	99	99	99	1	99	99	99	99	99	99	99	99	99	99	1	1	2	2	2	1
34	2	1	2	5	4	2	2	5	1	3	1	1	1	2	1	2	1	2	4	99	99	99	99	99	99	99	99	99	99	99	99	99	2	1	1	2	1	2	2	1	2	2	1	1	1	2	2	2	2
36	2	1	2	1	3	2	2	4	1	3	1	1	1	2	1	1	1	2	4	99	99	99	99	99	99	99	99	99	99	99	99	99	2	1	2	2	2	1	2	1	2	2	1	1	1	2	2	2	2
30	2	1	2	1	2	1	1	2	1	3	1	1	1	2	1	2	1	1	2	2	99	99	99	99	99	99	99	99	99	99	99	99	5	99	99	99	99	99	99	99	99	99	99	1	1	2	1	2	2
32	2	1	2	3	3	2	2	3	1	3	1	1	1	2	1	1	1	1	2	2	99	99	99	99	99	99	99	99	99	99	99	1	5	99	99	99	99	99	99	99	99	99	99	1	1	2	2	2	2
23	2	1	2	3	2	2	2	2	1	3	1	1	1	2	1	1	1	1	1	2	99	99	99	99	99	99	99	99	99	99	99	99	1	99	99	99	99	99	99	99	99	99	99	1	1	2	2	2	1
34	2	1	2	3	3	1	2	5	1	3	1	1	1	2	2	2	1	2	4	99	99	99	99	99	99	99	99	99	99	99	99	99	2	1	1	2	1	2	2	1	2	2	1	1	1	2	2	2	2
36	2	1	2	1	3	1	2	4	1	3	1	1	1	2	1	1	1	2	4	99	99	99	99	99	99	99	99	99	99	99	99	99	2	1	2	2	2	1	2	1	2	2	1	1	1	2	2	2	2
23	2	1	1	1	2	2	2	2	1	3	1	1	1	2	1	1	1	2	1	2	99	99	99	99	99	99	99	99	99	99	99	1	3	99	99	99	99	99	99	99	99	99	99	1	1	2	2	2	2
34	2	1	1	5	3	2	2	5	1	3	1	1	1	2	2	2	1	2	4	99	99	99	99	99	99	99	99	99	99	99	99	99	2	1	1	2	1	2	2	1	2	2	1	1	1	2	2	2	2
36	2	1	2	1	3	2	2	4	1	3	1	1	1	2	1	1	1	2	4	99	99	99	99	99	99	99	99	99	99	99	99	99	2	1	2	2	2	1	2	1	2	2	1	1	1	2	2	2	2
30	2	1	2	1	3	1	1	2	1	3	1	1	1	2	2	2	1	1	2	2	99	99	99	99	99	99	99	99	99	99	99	99	5	99	99	99	99	99	99	99	99	99	99	1	1	2	1	2	2
34	2	1	2	2	3	1	2	5	1	3	1	1	1	2	1	2	1	2	4	99	99	99	99	99	99	99	99	99	99	99	99	99	2	1	1	2	1	2	2	1	2	2	1	1	1	2	2	2	2
36	2	1	2	1	3	1	2	4	1	3	1	1	1	2	2	1	1	2	4	99	99	99	99	99	99	99	99	99	99	99	99	99	2	1	2	2	2	1	2	1	2	2	1	1	1	2	2	2	2
30	2	1	2	2	1	1	1	2	1	3	1	1	1	2	2	2	1	1	2	2	99	99	99	99	99	99	99	99	99	99	99	99	5	99	99	99	99	99	99	99	99	99	99	1	1	2	1	2	2
32	2	1	2	1	3	1	2	3	1	3	1	1	1	2	1	1	1	1	2	2	99	99	99	99	99	99	99	99	99	99	99	1	5	99	99	99	99	99	99	99	99	99	99	1	1	2	2	2	2
23	2	1	2	3	3	1	2	2	1	3	1	1	1	2	1	1	1	1	1	2	99	99	99	99	99	99	99	99	99	99	99	99	1	99	99	99	99	99	99	99	99	99	99	1	1	2	2	2	1
34	2	1	2	1	3	2	2	5	1	3	1	1	1	2	1	2	1	2	4	99	99	99	99	99	99	99	99	99	99	99	99	99	2	1	1	2	1	2	2	1	2	2	1	1	1	2	2	2	2
36	2	1	2	1	3	2	2	4	1	3	1	1	1	2	1	1	1	2	4	99	99	99	99	99	99	99	99	99	99	99	99	99	2	1	2	2	2	1	2	1	2	2	1	1	1	2	2	2	2
23	2	1	2	1	2	1	2	2	1	3	1	1	1	2	1	1	1	2	1	2	99	99	99	99	99	99	99	99	99	99	99	1	3	99	99	99	99	99	99	99	99	99	99	1	1	2	2	2	2
34	2	1	2	4	3	1	2	5	1	3	1	1	1	2	2	2	1	2	4	99	99	99	99	99	99	99	99	99	99	99	99	99	2	1	1	2	1	2	2	1	2	2	1	1	1	2	2	2	2
36	2	1	1	1	3	1	2	4	1	3	1	1	1	2	1	1	1	2	4	99	99	99	99	99	99	99	99	99	99	99	99	99	2	1	2	2	2	1	2	1	2	2	1	1	1	2	2	2	2
34	2	1	2	3	2	2	2	5	1	3	1	1	1	2	1	2	1	2	4	99	99	99	99	99	99	99	99	99	99	99	99	99	2	1	1	2	1	2	2	1	2	2	1	1	1	2	2	2	2
36	2	1	2	1	2	1	2	4	1	3	1	1	1	2	1	1	1	2	4	99	99	99	99	99	99	99	99	99	99	99	99	99	2	1	2	2	2	1	2	1	2	2	1	1	1	2	2	2	2
36	2	1	2	2	3	2	2	4	1	3	1	1	1	2	1	1	1	2	4	99	99	99	99	99	99	99	99	99	99	99	99	99	2	1	2	2	2	1	2	1	2	2	1	1	1	2	2	2	2
36	2	1	2	1	1	2	2	4	1	3	1	1	1	2	2	1	1	2	4	99	99	99	99	99	99	99	99	99	99	99	99	99	2	1	2	2	2	1	2	1	2	2	1	1	1	2	2	2	2
32	2	1	2	1	2	2	2	3	1	3	2	1	1	2	2	1	1	1	2	2	99	99	99	99	99	99	99	99	99	99	99	1	5	99	99	99	99	99	99	99	99	99	99	1	1	2	2	2	2
30	2	1	2	1	3	1	1	2	1	3	2	1	1	2	1	1	1	1	2	2	99	99	99	99	99	99	99	99	99	99	99	99	5	99	99	99	99	99	99	99	99	99	99	1	1	2	1	2	2
32	2	1	2	4	3	1	2	3	1	3	2	1	1	2	1	1	1	1	4	99	99	99	99	99	99	99	99	99	99	99	99	1	5	99	99	99	99	99	99	99	99	99	99	1	1	2	2	2	2
23	2	1	2	2	1	1	2	2	1	3	2	1	1	2	1	1	1	1	4	99	99	99	99	99	99	99	99	99	99	99	99	99	1	99	99	99	99	99	99	99	99	99	99	1	1	2	2	2	1
30	2	1	1	1	3	2	1	2	1	3	2	1	1	2	2	1	1	1	4	99	99	99	99	99	99	99	99	99	99	99	99	99	5	99	99	99	99	99	99	99	99	99	99	1	1	2	1	2	2
32	2	1	2	3	3	2	2	3	1	3	2	1	1	2	1	1	1	1	4	99	99	99	99	99	99	99	99	99	99	99	99	1	5	99	99	99	99	99	99	99	99	99	99	1	1	2	2	2	2
30	2	1	2	5	4	2	1	2	1	3	2	1	1	2	1	2	1	1	4	99	99	99	99	99	99	99	99	99	99	99	99	99	5	99	99	99	99	99	99	99	99	99	99	1	1	2	1	2	2
23	2	1	2	5	4	1	2	2	1	3	2	1	1	2	1	1	1	1	1	2	99	99	99	99	99	99	99	99	99	99	99	99	1	99	99	99	99	99	99	99	99	99	99	1	1	2	2	2	1
30	2	1	2	1	3	3	1	2	1	3	2	1	1	2	1	1	1	1	2	2	99	99	99	99	99	99	99	99	99	99	99	99	5	99	99	99	99	99	99	99	99	99	99	1	1	2	1	2	2
32	2	1	2	4	2	1	2	3	1	3	2	1	1	2	1	1	1	1	4	99	99	99	99	99	99	99	99	99	99	99	99	1	5	99	99	99	99	99	99	99	99	99	99	1	1	2	2	2	2
23	2	1	2	1	3	1	2	2	1	3	2	1	1	2	1	1	1	2	4	99	99	99	99	99	99	99	99	99	99	99	99	1	3	99	99	99	99	99	99	99	99	99	99	1	1	2	2	2	2
30	2	1	2	1	2	2	1	2	1	3	2	1	1	2	2	1	1	1	2	2	99	99	99	99	99	99	99	99	99	99	99	99	5	99	99	99	99	99	99	99	99	99	99	1	1	2	1	2	2
23	2	1	2	1	3	1	2	2	1	3	2	1	1	2	2	1	1	1	4	99	99	99	99	99	99	99	99	99	99	99	99	99	1	99	99	99	99	99	99	99	99	99	99	1	1	2	2	2	1
25	2	1	2	1	3	1	2	3	1	4	1	1	1	2	1	1	1	1	2	99	99	99	99	99	99	99	99	99	99	99	99	99	3	99	99	99	99	99	99	99	99	99	99	1	1	2	2	2	2
42	2	1	2	3	3	1	2	8	1	4	1	1	1	2	2	1	1	1	4	99	99	99	99	99	99	99	99	99	99	99	99	99	2	99	99	99	99	99	99	99	99	99	99	1	1	2	2	2	1
23	2	1	2	1	3	2	2	2	1	4	1	1	1	2	1	1	1	2	4	99	99	99	99	99	99	99	99	99	99	99	99	1	3	99	99	99	99	99	99	99	99	99	99	1	1	2	2	2	2
26	2	1	1	1	3	1	2	1	1	4	1	1	1	2	1	1	1	1	2	2	99	99	99	99	99	99	99	99	99	99	99	1	3	99	99	99	99	99	99	99	99	99	99	2	1	1	2	2	2
28	2	1	2	1	3	1	2	2	1	4	1	1	1	2	2	1	1	2	4	99	99	99	99	99	99	99	99	99	99	99	99	99	3	99	99	99	99	99	99	99	99	99	99	1	1	2	2	1	2
22	2	1	2	1	3	2	1	2	1	4	1	1	1	2	2	1	1	1	1	2	99	99	99	99	99	99	99	99	99	99	99	99	3	99	99	99	99	99	99	99	99	99	99	1	1	2	2	2	2
42	2	1	2	1	3	1	2	8	1	4	1	1	1	2	1	1	1	1	4	99	99	99	99	99	99	99	99	99	99	99	99	99	2	99	99	99	99	99	99	99	99	99	99	1	1	2	2	2	1
33	2	1	2	1	3	1	2	5	1	4	1	1	1	2	1	1	1	1	4	99	99	99	99	99	99	99	99	99	99	99	99	99	2	1	2	2	1	2	2	1	2	1	1	1	1	2	1	2	2
23	2	1	2	1	3	1	2	2	1	4	1	1	1	2	1	1	1	2	4	99	99	99	99	99	99	99	99	99	99	99	99	1	3	99	99	99	99	99	99	99	99	99	99	1	1	2	2	2	2
28	2	1	2	1	3	2	2	2	1	4	1	1	1	2	1	1	1	2	4	99	99	99	99	99	99	99	99	99	99	99	99	99	3	99	99	99	99	99	99	99	99	99	99	1	1	2	2	1	2
25	2	1	2	3	3	1	2	3	1	4	1	1	1	2	1	1	1	1	2	99	99	99	99	99	99	99	99	99	99	99	99	99	3	99	99	99	99	99	99	99	99	99	99	1	1	2	2	2	2
22	2	1	2	1	3	1	1	2	1	4	1	1	1	2	1	1	1	1	1	2	99	99	99	99	99	99	99	99	99	99	99	99	3	99	99	99	99	99	99	99	99	99	99	1	1	2	2	2	2
42	2	1	2	5	4	2	2	8	1	4	1	1	1	2	2	1	1	1	4	99	99	99	99	99	99	99	99	99	99	99	99	99	2	99	99	99	99	99	99	99	99	99	99	1	1	2	2	2	1
32	2	1	2	1	3	2	2	4	1	4	1	1	1	2	1	1	1	1	4	99	99	99	99	99	99	99	99	99	99	99	99	99	2	1	2	2	2	1	2	1	2	1	1	1	1	2	2	2	1
18	2	1	2	1	3	2	2	1	1	4	1	2	1	2	1	1	1	1	2	2	99	99	99	99	99	99	99	99	99	99	99	1	5	99	99	99	99	99	99	99	99	99	99	1	1	2	1	1	1
23	2	1	2	5	4	1	2	2	1	4	1	1	1	2	2	1	1	2	1	2	99	99	99	99	99	99	99	99	99	99	99	1	3	99	99	99	99	99	99	99	99	99	99	1	1	2	2	2	2
28	2	1	2	1	3	1	2	2	1	4	1	1	1	2	1	1	1	2	4	99	99	99	99	99	99	99	99	99	99	99	99	99	3	99	99	99	99	99	99	99	99	99	99	1	1	2	2	1	2
22	2	1	2	1	3	2	1	2	1	4	1	1	1	2	2	1	1	1	4	99	99	99	99	99	99	99	99	99	99	99	99	99	3	99	99	99	99	99	99	99	99	99	99	1	1	2	2	2	2
22	2	1	2	3	2	2	1	2	1	4	1	1	1	2	1	1	1	1	4	2	99	99	99	99	99	99	99	99	99	99	99	99	3	99	99	99	99	99	99	99	99	99	99	1	1	2	2	2	2
42	2	1	2	1	3	2	2	8	1	4	1	1	1	2	2	1	1	1	4	99	99	99	99	99	99	99	99	99	99	99	99	99	2	99	99	99	99	99	99	99	99	99	99	1	1	2	2	2	1
32	2	1	2	1	3	2	2	3	1	4	1	1	1	2	1	1	1	1	2	2	99	99	99	99	99	99	99	99	99	99	99	1	5	99	99	99	99	99	99	99	99	99	99	1	1	2	2	2	2
18	2	1	2	3	3	2	2	1	1	4	1	2	1	2	2	1	1	1	2	2	99	99	99	99	99	99	99	99	99	99	99	1	5	99	99	99	99	99	99	99	99	99	99	1	1	2	1	1	1
24	2	1	2	2	2	1	1	1	1	4	1	1	1	2	2	1	1	1	4	99	99	99	99	99	99	99	99	99	99	99	99	1	3	99	99	99	99	99	99	99	99	99	99	1	1	2	1	2	2
26	2	1	2	1	3	1	2	1	1	4	1	1	1	2	2	1	1	1	2	2	99	99	99	99	99	99	99	99	99	99	99	1	3	99	99	99	99	99	99	99	99	99	99	2	1	1	2	2	2
28	2	1	2	2	3	1	2	2	1	4	1	1	1	2	1	1	1	2	4	99	99	99	99	99	99	99	99	99	99	99	99	99	3	99	99	99	99	99	99	99	99	99	99	1	1	2	2	1	2
25	2	1	2	1	3	2	2	3	1	4	1	1	1	2	2	1	1	1	2	99	99	99	99	99	99	99	99	99	99	99	99	99	3	99	99	99	99	99	99	99	99	99	99	1	1	2	2	2	2
42	2	1	2	3	3	1	2	8	1	4	1	1	1	2	1	1	1	1	4	99	99	99	99	99	99	99	99	99	99	99	99	99	2	99	99	99	99	99	99	99	99	99	99	1	1	2	2	2	1
28	2	1	2	4	2	2	2	2	1	4	1	1	1	2	1	1	1	2	4	99	99	99	99	99	99	99	99	99	99	99	99	99	3	99	99	99	99	99	99	99	99	99	99	1	1	2	2	1	2
25	2	1	2	2	3	1	2	3	1	4	1	1	1	2	1	1	1	1	4	99	99	99	99	99	99	99	99	99	99	99	99	99	3	99	99	99	99	99	99	99	99	99	99	1	1	2	2	2	2
22	2	1	2	1	2	2	1	2	1	4	1	1	1	2	1	1	1	1	1	2	99	99	99	99	99	99	99	99	99	99	99	99	3	99	99	99	99	99	99	99	99	99	99	1	1	2	2	2	2
42	2	1	2	1	2	2	2	8	1	4	1	1	1	2	1	1	1	1	4	99	99	99	99	99	99	99	99	99	99	99	99	99	2	99	99	99	99	99	99	99	99	99	99	1	1	2	2	2	1
25	2	1	2	1	3	2	2	3	1	4	1	1	1	2	1	1	1	1	4	99	99	99	99	99	99	99	99	99	99	99	99	99	3	99	99	99	99	99	99	99	99	99	99	1	1	2	2	2	2
32	2	1	2	1	2	2	2	3	1	4	1	1	1	2	1	1	1	1	4	99	99	99	99	99	99	99	99	99	99	99	99	1	5	99	99	99	99	99	99	99	99	99	99	1	1	2	2	2	2
33	2	1	2	4	3	2	2	5	1	4	1	1	1	2	1	1	1	1	4	99	99	99	99	99	99	99	99	99	99	99	99	99	2	1	2	2	1	2	2	1	2	1	1	1	1	2	1	2	2
26	2	1	2	1	3	1	2	1	1	4	2	1	1	2	1	1	1	1	4	99	99	99	99	99	99	99	99	99	99	99	99	1	3	99	99	99	99	99	99	99	99	99	99	2	1	1	2	2	2
23	2	1	2	3	3	1	2	2	1	4	2	1	1	2	2	1	1	1	1	2	99	99	99	99	99	99	99	99	99	99	99	99	1	99	99	99	99	99	99	99	99	99	99	1	1	2	2	2	1
22	2	1	2	1	3	1	1	2	1	4	2	1	1	2	1	1	1	1	1	2	99	99	99	99	99	99	99	99	99	99	99	99	3	99	99	99	99	99	99	99	99	99	99	1	1	2	2	2	2
25	2	1	2	1	3	2	2	3	1	4	2	1	1	2	1	1	1	1	2	99	99	99	99	99	99	99	99	99	99	99	99	99	3	99	99	99	99	99	99	99	99	99	99	1	1	2	2	2	2
18	2	1	1	1	2	1	2	1	1	4	2	2	1	2	2	1	1	1	2	2	99	99	99	99	99	99	99	99	99	99	99	1	5	99	99	99	99	99	99	99	99	99	99	1	1	2	1	1	1
28	2	1	2	1	2	2	2	2	1	4	2	1	1	2	1	1	1	2	4	99	99	99	99	99	99	99	99	99	99	99	99	99	3	99	99	99	99	99	99	99	99	99	99	1	1	2	2	1	2
25	2	1	2	4	3	1	2	3	1	4	2	1	1	2	1	1	1	1	2	99	99	99	99	99	99	99	99	99	99	99	99	99	3	99	99	99	99	99	99	99	99	99	99	1	1	2	2	2	2
32	2	1	2	4	3	2	2	4	1	4	2	1	1	2	1	1	1	1	4	99	99	99	99	99	99	99	99	99	99	99	99	99	2	1	2	2	2	1	2	1	2	1	1	1	1	2	2	2	1
28	2	1	2	1	2	1	2	2	1	4	2	1	1	2	1	1	1	2	4	99	99	99	99	99	99	99	99	99	99	99	99	99	3	99	99	99	99	99	99	99	99	99	99	1	1	2	2	1	2
22	2	1	1	1	2	2	1	2	1	4	2	1	1	2	1	1	1	1	1	2	99	99	99	99	99	99	99	99	99	99	99	99	3	99	99	99	99	99	99	99	99	99	99	1	1	2	2	2	2
28	2	1	2	3	2	1	2	2	1	4	2	1	1	2	1	1	1	2	4	99	99	99	99	99	99	99	99	99	99	99	99	99	3	99	99	99	99	99	99	99	99	99	99	1	1	2	2	1	2
22	2	1	2	3	2	1	1	2	1	4	2	1	1	2	2	1	1	1	4	99	99	99	99	99	99	99	99	99	99	99	99	99	3	99	99	99	99	99	99	99	99	99	99	1	1	2	2	2	2
42	2	1	2	1	3	1	2	8	1	4	2	1	1	2	1	1	1	1	4	99	99	99	99	99	99	99	99	99	99	99	99	99	2	99	99	99	99	99	99	99	99	99	99	1	1	2	2	2	1
22	2	1	2	3	3	2	1	2	1	4	2	1	1	2	1	1	1	1	4	99	99	99	99	99	99	99	99	99	99	99	99	99	3	99	99	99	99	99	99	99	99	99	99	1	1	2	2	2	2
25	2	1	2	4	3	1	2	3	1	4	2	1	1	2	1	1	1	1	2	99	99	99	99	99	99	99	99	99	99	99	99	99	3	99	99	99	99	99	99	99	99	99	99	1	1	2	2	2	2
22	2	1	2	3	3	1	1	2	1	4	2	1	1	2	1	1	1	1	4	99	99	99	99	99	99	99	99	99	99	99	99	99	3	99	99	99	99	99	99	99	99	99	99	1	1	2	2	2	2
42	2	1	2	1	3	1	2	8	1	4	5	1	1	2	1	1	1	1	4	99	99	99	99	99	99	99	99	99	99	99	99	99	2	99	99	99	99	99	99	99	99	99	99	1	1	2	2	2	1
23	2	1	2	2	3	1	2	2	1	5	1	1	1	2	2	1	1	2	1	2	99	99	99	99	99	99	99	99	99	99	99	1	3	99	99	99	99	99	99	99	99	99	99	1	1	2	2	2	2
29	2	1	2	1	3	2	2	2	1	5	1	1	1	2	1	1	1	1	4	99	99	99	99	99	99	99	99	99	99	99	99	99	2	1	2	2	1	2	2	1	2	2	1	1	1	2	2	1	2
20	2	1	2	1	3	2	2	1	1	5	1	1	1	2	1	1	1	1	4	99	99	99	99	99	99	99	99	99	99	99	99	99	2	1	2	2	1	2	2	1	1	2	1	1	1	2	2	2	2
36	2	1	2	1	3	2	1	3	1	5	1	1	1	2	1	1	1	1	4	99	99	99	99	99	99	99	99	99	99	99	99	99	2	1	2	2	1	2	2	1	2	2	1	1	1	2	1	1	1
29	2	1	2	1	3	1	2	2	1	5	1	1	1	2	1	1	1	1	4	99	99	99	99	99	99	99	99	99	99	99	99	99	2	1	2	2	1	2	2	1	2	2	1	1	1	2	2	1	2
34	2	1	2	1	3	2	1	3	1	5	1	1	1	2	1	1	1	1	4	99	99	99	99	99	99	99	99	99	99	99	99	99	2	1	2	2	1	2	2	1	2	2	1	1	1	2	2	2	2
36	2	1	2	5	3	2	1	3	1	5	1	1	1	2	2	1	1	1	4	99	99	99	99	99	99	99	99	99	99	99	99	99	2	1	2	2	1	2	2	1	2	2	1	1	1	2	1	1	1
29	2	1	2	5	4	1	2	2	1	5	1	1	1	2	1	1	1	1	4	99	99	99	99	99	99	99	99	99	99	99	99	99	2	1	2	2	1	2	2	1	2	2	1	1	1	2	2	1	2
29	2	1	2	3	3	2	2	2	1	5	1	1	1	2	1	1	1	1	4	99	99	99	99	99	99	99	99	99	99	99	99	99	2	1	2	2	1	2	2	1	2	2	1	1	1	2	2	1	2
20	2	1	2	3	3	2	2	1	1	5	1	1	1	2	1	1	1	1	4	99	99	99	99	99	99	99	99	99	99	99	99	99	2	1	2	2	1	2	2	1	1	2	1	1	1	2	2	2	2
34	2	1	2	3	2	2	1	3	1	5	1	1	1	2	1	1	1	1	4	99	99	99	99	99	99	99	99	99	99	99	99	99	2	1	2	2	1	2	2	1	2	2	1	1	1	2	2	2	2
29	2	1	2	2	3	1	2	2	1	5	1	1	1	2	1	1	1	1	4	99	99	99	99	99	99	99	99	99	99	99	99	99	2	1	2	2	1	2	2	1	2	2	1	1	1	2	2	1	2
29	2	1	2	1	2	1	2	2	1	5	1	1	1	2	1	1	1	1	4	99	99	99	99	99	99	99	99	99	99	99	99	99	2	1	2	2	1	2	2	1	2	2	1	1	1	2	2	1	2
29	2	1	2	1	3	2	2	2	1	5	1	1	1	2	2	1	1	1	4	99	99	99	99	99	99	99	99	99	99	99	99	99	2	1	2	2	1	2	2	1	2	2	1	1	1	2	2	1	2
29	2	1	2	1	3	1	2	2	1	5	1	1	1	2	1	1	1	1	4	99	99	99	99	99	99	99	99	99	99	99	99	99	2	1	2	2	1	2	2	1	2	2	1	1	1	2	2	1	2
29	2	1	2	2	3	1	2	2	1	5	1	1	1	2	1	1	1	1	4	99	99	99	99	99	99	99	99	99	99	99	99	99	2	1	2	2	1	2	2	1	2	2	1	1	1	2	2	1	2
20	2	1	2	4	2	1	2	1	1	5	1	1	1	2	1	1	1	1	4	99	99	99	99	99	99	99	99	99	99	99	99	99	2	1	2	2	1	2	2	1	1	2	1	1	1	2	2	2	2
34	2	1	2	1	2	1	1	3	1	5	1	1	1	2	1	1	1	1	4	99	99	99	99	99	99	99	99	99	99	99	99	99	2	1	2	2	1	2	2	1	2	2	1	1	1	2	2	2	2
36	2	1	2	4	3	1	1	3	1	5	1	1	1	2	2	1	1	1	4	99	99	99	99	99	99	99	99	99	99	99	99	99	2	1	2	2	1	2	2	1	2	2	1	1	1	2	1	1	1
28	2	1	2	4	2	1	2	2	1	5	2	1	1	2	2	1	1	2	4	99	99	99	99	99	99	99	99	99	99	99	99	99	3	99	99	99	99	99	99	99	99	99	99	1	1	2	2	1	2
20	2	1	2	3	3	1	2	1	1	6	1	1	1	2	2	1	1	1	4	99	99	99	99	99	99	99	99	99	99	99	99	99	2	1	2	2	1	2	2	1	1	2	1	1	1	2	2	2	2
34	2	1	2	1	2	1	1	3	1	6	1	1	1	2	1	1	1	2	4	99	99	99	99	99	99	99	99	99	99	99	99	99	2	1	2	2	1	2	2	1	2	2	1	1	1	2	2	2	2
36	2	1	2	3	1	1	1	3	1	6	1	1	1	2	1	1	1	1	4	99	99	99	99	99	99	99	99	99	99	99	99	99	2	1	2	2	1	2	2	1	2	2	1	1	1	2	1	1	1
20	2	1	2	3	2	1	2	1	1	6	1	1	1	2	2	1	1	2	4	99	99	99	99	99	99	99	99	99	99	99	99	99	2	1	2	2	1	2	2	1	1	2	1	1	1	2	2	2	2
34	2	1	2	1	3	1	1	3	1	6	1	1	1	2	1	1	1	1	4	99	99	99	99	99	99	99	99	99	99	99	99	99	2	1	2	2	1	2	2	1	2	2	1	1	1	2	2	2	2
36	2	1	2	1	3	1	1	3	1	6	1	1	1	2	1	1	1	1	4	99	99	99	99	99	99	99	99	99	99	99	99	99	2	1	2	2	1	2	2	1	2	2	1	1	1	2	1	1	1
20	2	1	2	2	2	1	2	1	1	6	1	1	1	2	1	1	1	1	4	99	99	99	99	99	99	99	99	99	99	99	99	99	2	1	2	2	1	2	2	1	1	2	1	1	1	2	2	2	2
34	2	1	2	3	3	1	1	3	1	6	1	1	1	2	1	1	1	1	4	99	99	99	99	99	99	99	99	99	99	99	99	99	2	1	2	2	1	2	2	1	2	2	1	1	1	2	2	2	2
36	2	1	2	1	1	1	1	3	1	6	1	1	1	2	1	1	1	1	4	99	99	99	99	99	99	99	99	99	99	99	99	99	2	1	2	2	1	2	2	1	2	2	1	1	1	2	1	1	1
34	2	1	1	2	3	2	1	3	1	6	1	1	1	2	1	1	1	1	4	99	99	99	99	99	99	99	99	99	99	99	99	99	2	1	2	2	1	2	2	1	2	2	1	1	1	2	2	2	2
37	2	1	2	1	2	2	1	3	1	6	1	1	1	2	1	1	1	1	4	99	99	99	99	99	99	99	99	99	99	99	99	99	2	1	2	2	1	2	2	1	2	2	1	1	1	2	1	1	1
33	1	0	2	1	2	3	2	4	1	3	1	1	1	2	1	2	1	2	4	99	99	99	99	99	99	99	99	99	99	99	99	99	2	99	99	99	99	99	99	99	99	99	99	2	1	2	2	2	2
33	1	0	2	5	4	3	2	4	1	3	1	1	1	2	1	2	1	2	4	99	99	99	99	99	99	99	99	99	99	99	99	99	2	99	99	99	99	99	99	99	99	99	99	2	1	2	2	2	2
33	1	0	2	1	3	1	2	4	1	3	1	1	1	2	1	2	1	2	4	99	99	99	99	99	99	99	99	99	99	99	99	99	2	99	99	99	99	99	99	99	99	99	99	2	1	2	2	2	2
33	1	0	2	1	3	1	2	4	1	3	1	1	1	2	2	2	1	2	4	99	99	99	99	99	99	99	99	99	99	99	99	99	2	99	99	99	99	99	99	99	99	99	99	2	1	2	2	2	2
33	1	0	2	1	2	1	2	4	1	3	1	1	1	2	1	2	1	2	4	99	99	99	99	99	99	99	99	99	99	99	99	99	2	99	99	99	99	99	99	99	99	99	99	2	1	2	2	2	2
33	1	0	2	1	1	3	1	5	1	3	2	1	1	2	2	1	1	1	4	99	99	99	99	99	99	99	99	99	99	99	99	99	2	1	2	2	1	2	2	1	2	2	1	2	1	2	1	2	2
33	1	0	2	1	3	1	1	5	1	3	2	1	1	2	2	1	1	1	4	99	99	99	99	99	99	99	99	99	99	99	99	99	2	1	2	2	1	2	2	1	2	2	1	2	1	2	1	2	2
33	1	0	2	1	3	1	1	5	1	3	2	1	1	2	1	1	1	1	4	99	99	99	99	99	99	99	99	99	99	99	99	99	2	1	2	2	1	2	2	1	2	2	1	2	1	2	1	2	2
33	1	0	2	1	3	2	1	5	1	3	2	1	1	2	1	1	1	1	4	99	99	99	99	99	99	99	99	99	99	99	99	99	2	1	2	2	1	2	2	1	2	2	1	2	1	2	1	2	2
33	1	0	2	1	3	1	1	5	1	3	2	1	1	2	2	1	1	1	4	99	99	99	99	99	99	99	99	99	99	99	99	99	2	1	2	2	1	2	2	1	2	2	1	2	1	2	1	2	2
32	1	0	1	1	1	1	2	4	1	4	1	1	1	2	1	1	1	1	1	2	99	99	99	99	99	99	99	99	99	99	99	1	1	99	99	99	99	99	99	99	99	99	99	1	1	2	2	2	2
16	1	0	2	1	1	2	2	1	1	4	2	1	2	1	1	1	1	1	1	99	99	99	99	99	99	99	99	99	99	99	99	99	3	99	99	99	99	99	99	99	99	99	99	1	1	2	2	2	2
28	1	0	2	1	2	1	2	2	1	4	2	1	1	1	1	1	1	2	4	99	99	99	99	99	99	99	99	99	99	99	99	99	3	99	99	99	99	99	99	99	99	99	99	1	1	2	2	1	2
16	1	0	2	3	3	1	2	1	1	4	2	1	1	2	2	1	1	1	4	99	99	99	99	99	99	99	99	99	99	99	99	99	3	99	99	99	99	99	99	99	99	99	99	1	1	2	2	2	2
16	1	0	2	1	3	1	2	1	1	4	2	1	1	2	1	1	1	1	4	99	99	99	99	99	99	99	99	99	99	99	99	99	3	99	99	99	99	99	99	99	99	99	99	1	1	2	2	2	2
16	1	0	2	1	3	2	2	1	1	4	2	1	1	2	1	1	1	1	4	99	99	99	99	99	99	99	99	99	99	99	99	99	3	99	99	99	99	99	99	99	99	99	99	1	1	2	2	2	2
16	1	0	2	1	3	1	2	1	1	4	2	1	1	2	2	1	1	1	1	99	99	99	99	99	99	99	99	99	99	99	99	99	3	99	99	99	99	99	99	99	99	99	99	1	1	2	2	2	2
16	1	0	2	3	3	1	2	1	1	4	2	1	1	2	1	1	1	1	1	99	99	99	99	99	99	99	99	99	99	99	99	99	3	99	99	99	99	99	99	99	99	99	99	1	1	2	2	2	2
22	1	0	2	1	3	2	1	2	1	4	2	1	1	2	1	1	1	1	4	99	99	99	99	99	99	99	99	99	99	99	99	99	3	99	99	99	99	99	99	99	99	99	99	1	1	2	2	2	2
16	1	0	2	1	3	1	2	1	1	4	2	1	1	2	1	1	1	1	1	99	99	99	99	99	99	99	99	99	99	99	99	99	3	99	99	99	99	99	99	99	99	99	99	1	1	2	2	2	2
22	1	0	2	3	3	1	1	2	1	4	2	1	1	2	1	1	1	1	1	2	99	99	99	99	99	99	99	99	99	99	99	99	3	99	99	99	99	99	99	99	99	99	99	1	1	2	2	2	2
16	1	0	2	1	2	2	2	1	1	4	2	1	1	2	2	1	1	1	4	99	99	99	99	99	99	99	99	99	99	99	99	99	3	99	99	99	99	99	99	99	99	99	99	1	1	2	2	2	2
16	1	0	2	1	3	3	2	1	1	4	2	1	1	2	2	1	1	1	1	99	99	99	99	99	99	99	99	99	99	99	99	99	3	99	99	99	99	99	99	99	99	99	99	1	1	2	2	2	2
28	1	0	2	4	3	1	2	2	1	4	2	1	1	2	1	1	1	2	4	99	99	99	99	99	99	99	99	99	99	99	99	99	3	99	99	99	99	99	99	99	99	99	99	1	1	2	2	1	2
16	1	0	2	1	3	1	2	1	1	4	2	1	1	2	1	1	1	1	1	99	99	99	99	99	99	99	99	99	99	99	99	99	3	99	99	99	99	99	99	99	99	99	99	1	1	2	2	2	2
28	1	0	2	2	3	1	2	2	1	4	2	1	1	1	1	1	1	2	4	99	99	99	99	99	99	99	99	99	99	99	99	99	3	99	99	99	99	99	99	99	99	99	99	1	1	2	2	1	2
42	1	0	2	1	2	1	2	8	1	4	5	1	1	2	1	1	1	1	4	99	99	99	99	99	99	99	99	99	99	99	99	99	2	99	99	99	99	99	99	99	99	99	99	1	1	2	2	2	1
42	1	0	2	1	3	3	2	8	1	4	5	1	1	2	1	1	1	1	4	99	99	99	99	99	99	99	99	99	99	99	99	99	2	99	99	99	99	99	99	99	99	99	99	1	1	2	2	2	1
29	1	0	2	1	3	1	2	2	1	5	1	1	1	2	1	1	1	1	4	99	99	99	99	99	99	99	99	99	99	99	99	99	2	1	2	2	1	2	2	1	2	2	1	1	1	2	2	1	2
29	1	0	2	4	3	1	2	2	1	5	1	1	1	2	2	1	1	1	4	99	99	99	99	99	99	99	99	99	99	99	99	99	2	1	2	2	1	2	2	1	2	2	1	1	1	2	2	1	2
29	1	0	2	1	3	2	2	2	1	5	1	1	1	2	1	1	1	1	4	99	99	99	99	99	99	99	99	99	99	99	99	99	2	1	2	2	1	2	2	1	2	2	1	1	1	2	2	1	2
20	1	0	2	5	3	1	2	1	1	6	1	1	1	2	2	1	1	1	4	99	99	99	99	99	99	99	99	99	99	99	99	99	2	1	2	2	1	2	2	1	1	2	1	1	1	2	2	2	2
36	1	0	2	5	3	1	1	3	1	6	1	1	1	2	1	1	1	2	4	99	99	99	99	99	99	99	99	99	99	99	99	99	2	1	2	2	1	2	2	1	2	2	1	1	1	2	1	1	1
20	1	0	2	1	3	2	2	1	1	6	1	1	1	2	2	1	1	1	4	99	99	99	99	99	99	99	99	99	99	99	99	99	2	1	2	2	1	2	2	1	1	2	1	1	1	2	2	2	2
34	1	0	2	5	3	3	1	3	1	6	1	1	1	2	1	1	1	1	4	99	99	99	99	99	99	99	99	99	99	99	99	99	2	1	2	2	1	2	2	1	2	2	1	1	1	2	2	2	2
36	1	0	2	1	3	1	1	3	1	6	1	1	1	2	1	1	1	1	4	99	99	99	99	99	99	99	99	99	99	99	99	99	2	1	2	2	1	2	2	1	2	2	1	1	1	2	1	1	1
20	1	0	2	1	3	1	2	1	1	6	1	1	1	2	1	1	1	2	4	99	99	99	99	99	99	99	99	99	99	99	99	99	2	1	2	2	1	2	2	1	1	2	1	1	1	2	2	2	2
34	1	0	1	1	3	1	1	3	1	6	1	1	1	2	1	1	1	1	4	99	99	99	99	99	99	99	99	99	99	99	99	99	2	1	2	2	1	2	2	1	2	2	1	1	1	2	2	2	2
36	1	0	2	3	1	1	1	3	1	6	1	1	1	2	1	1	1	1	4	99	99	99	99	99	99	99	99	99	99	99	99	99	2	1	2	2	1	2	2	1	2	2	1	1	1	2	1	1	1
20	1	0	2	1	3	3	2	1	1	6	1	1	1	2	2	1	1	1	4	99	99	99	99	99	99	99	99	99	99	99	99	99	2	1	2	2	1	2	2	1	1	2	1	1	1	2	2	2	2
34	1	0	2	3	3	3	1	3	1	6	1	1	1	2	1	1	1	1	4	99	99	99	99	99	99	99	99	99	99	99	99	99	2	1	2	2	1	2	2	1	2	2	1	1	1	2	2	2	2
36	1	0	2	1	3	2	1	3	1	6	1	1	1	2	1	1	1	2	4	99	99	99	99	99	99	99	99	99	99	99	99	99	2	1	2	2	1	2	2	1	2	2	1	1	1	2	1	1	1
20	1	0	1	2	3	1	2	1	1	6	1	1	1	2	1	1	1	1	4	99	99	99	99	99	99	99	99	99	99	99	99	99	2	1	2	2	1	2	2	1	1	2	1	1	1	2	2	2	2
34	1	0	2	1	3	1	1	3	1	6	1	1	1	2	1	1	1	1	4	99	99	99	99	99	99	99	99	99	99	99	99	99	2	1	2	2	1	2	2	1	2	2	1	1	1	2	2	2	2
36	1	0	2	1	3	3	1	3	1	6	1	1	1	2	1	1	1	1	4	99	99	99	99	99	99	99	99	99	99	99	99	99	2	1	2	2	1	2	2	1	2	2	1	1	1	2	1	1	1
34	1	0	1	1	3	1	1	3	1	6	1	1	1	2	1	1	1	1	4	99	99	99	99	99	99	99	99	99	99	99	99	99	2	1	2	2	1	2	2	1	2	2	1	1	1	2	2	2	2
36	1	0	2	4	3	1	1	3	1	6	1	1	1	2	2	1	1	1	4	99	99	99	99	99	99	99	99	99	99	99	99	99	2	1	2	2	1	2	2	1	2	2	1	1	1	2	1	1	1
36	1	0	1	1	3	1	1	3	1	6	1	1	1	2	1	1	1	1	4	99	99	99	99	99	99	99	99	99	99	99	99	99	2	1	2	2	1	2	2	1	2	2	1	1	1	2	1	1	1
36	1	0	1	3	3	2	1	3	1	6	1	1	1	2	1	1	1	1	4	99	99	99	99	99	99	99	99	99	99	99	99	99	2	1	2	2	1	2	2	1	2	2	1	1	1	2	1	1	1
23	1	0	2	1	3	1	2	2	1	1	3	1	1	2	1	1	1	2	1	2	99	99	99	99	99	99	99	99	99	99	99	1	3	99	99	99	99	99	99	99	99	99	99	1	1	2	2	2	2
23	1	0	2	1	3	1	2	2	1	1	3	1	1	2	1	1	1	2	1	2	99	99	99	99	99	99	99	99	99	99	99	1	3	99	99	99	99	99	99	99	99	99	99	1	1	2	2	2	2
23	1	0	2	1	3	2	2	2	1	1	3	1	1	2	1	1	1	2	1	2	99	99	99	99	99	99	99	99	99	99	99	1	3	99	99	99	99	99	99	99	99	99	99	1	1	2	2	2	2
23	1	0	2	1	3	3	2	2	1	1	3	1	1	2	1	1	1	2	1	2	99	99	99	99	99	99	99	99	99	99	99	1	3	99	99	99	99	99	99	99	99	99	99	1	1	2	2	2	2
23	1	0	2	1	3	2	2	2	1	1	3	1	1	2	1	1	1	2	1	2	99	99	99	99	99	99	99	99	99	99	99	1	3	99	99	99	99	99	99	99	99	99	99	1	1	2	2	2	2
23	1	0	2	1	3	1	2	2	1	1	3	1	1	2	1	1	1	2	1	2	99	99	99	99	99	99	99	99	99	99	99	1	3	99	99	99	99	99	99	99	99	99	99	1	1	2	2	2	2
23	1	0	2	1	3	1	2	2	1	1	3	1	1	2	1	1	1	2	1	2	99	99	99	99	99	99	99	99	99	99	99	1	3	99	99	99	99	99	99	99	99	99	99	1	1	2	2	2	2
23	1	0	2	1	3	3	2	2	1	1	3	1	1	2	1	1	1	2	1	2	99	99	99	99	99	99	99	99	99	99	99	1	3	99	99	99	99	99	99	99	99	99	99	1	1	2	2	2	2
23	1	0	3	2	3	3	2	2	1	1	3	1	1	2	1	1	1	2	1	2	99	99	99	99	99	99	99	99	99	99	99	1	3	99	99	99	99	99	99	99	99	99	99	1	1	2	2	2	2
23	1	0	2	1	3	1	2	2	1	1	3	1	1	2	1	1	1	2	1	2	99	99	99	99	99	99	99	99	99	99	99	1	3	99	99	99	99	99	99	99	99	99	99	1	1	2	2	2	2
33	1	0	2	1	3	1	2	5	1	2	1	1	1	2	1	2	1	1	4	99	99	99	99	99	99	99	99	99	99	99	99	99	2	1	2	2	1	2	2	1	2	1	1	1	1	2	1	2	2
33	1	0	2	1	3	2	2	5	1	2	1	1	1	2	1	2	1	1	4	99	99	99	99	99	99	99	99	99	99	99	99	99	2	1	2	2	1	2	2	1	2	1	1	1	1	2	1	2	2
33	1	0	2	1	3	3	2	5	1	2	1	1	1	2	1	2	1	1	4	99	99	99	99	99	99	99	99	99	99	99	99	99	2	1	2	2	1	2	2	1	2	1	1	1	1	2	1	2	2
33	1	0	2	1	3	1	2	5	1	2	1	1	1	2	1	2	1	1	4	99	99	99	99	99	99	99	99	99	99	99	99	99	2	1	2	2	1	2	2	1	2	1	1	1	1	2	1	2	2
33	1	0	2	1	3	3	2	5	1	2	1	1	1	2	1	2	1	1	4	99	99	99	99	99	99	99	99	99	99	99	99	99	2	1	2	2	1	2	2	1	2	1	1	1	1	2	1	2	2
33	1	0	2	1	3	1	2	5	1	2	1	1	1	2	1	2	1	1	4	99	99	99	99	99	99	99	99	99	99	99	99	99	2	1	2	2	1	2	2	1	2	1	1	1	1	2	1	2	2
33	1	0	2	1	3	2	2	5	1	2	1	1	1	2	1	2	1	1	4	99	99	99	99	99	99	99	99	99	99	99	99	99	2	1	2	2	1	2	2	1	2	1	1	1	1	2	1	2	2
33	1	0	2	1	3	2	2	5	1	2	1	1	1	2	1	2	1	1	4	99	99	99	99	99	99	99	99	99	99	99	99	99	2	1	2	2	1	2	2	1	2	1	1	1	1	2	1	2	2
33	1	0	2	2	3	3	2	5	1	2	1	1	1	2	1	2	1	1	4	99	99	99	99	99	99	99	99	99	99	99	99	99	2	1	2	2	1	2	2	1	2	1	1	1	1	2	1	2	2
32	1	0	2	1	3	1	2	4	1	2	2	1	1	2	1	2	1	1	4	99	99	99	99	99	99	99	99	99	99	99	99	99	2	1	2	2	2	1	2	1	2	1	1	1	1	2	2	2	1
18	1	0	2	1	3	3	2	1	1	2	2	2	1	2	1	2	1	1	2	2	99	99	99	99	99	99	99	99	99	99	99	1	5	99	99	99	99	99	99	99	99	99	99	1	1	2	1	1	1
26	1	0	2	1	2	1	2	1	1	2	2	1	1	2	1	1	1	1	2	2	99	99	99	99	99	99	99	99	99	99	99	1	3	99	99	99	99	99	99	99	99	99	99	2	1	1	2	2	2
32	1	0	2	1	3	2	2	4	1	2	2	1	1	2	1	2	1	1	4	99	99	99	99	99	99	99	99	99	99	99	99	99	2	1	2	2	2	1	2	1	2	1	1	1	1	2	2	2	1
18	1	0	2	1	3	1	2	1	1	2	2	2	1	2	1	2	1	1	2	2	99	99	99	99	99	99	99	99	99	99	99	1	5	99	99	99	99	99	99	99	99	99	99	1	1	2	1	1	1
26	1	0	2	1	2	1	2	1	1	2	2	1	1	2	1	1	1	1	2	2	99	99	99	99	99	99	99	99	99	99	99	1	3	99	99	99	99	99	99	99	99	99	99	2	1	1	2	2	2
32	1	0	2	1	3	2	2	4	1	2	2	1	1	2	1	2	1	1	4	99	99	99	99	99	99	99	99	99	99	99	99	99	2	1	2	2	2	1	2	1	2	1	1	1	1	2	2	2	1
18	1	0	2	1	3	2	2	1	1	2	2	2	1	2	1	2	1	1	2	2	99	99	99	99	99	99	99	99	99	99	99	1	5	99	99	99	99	99	99	99	99	99	99	1	1	2	1	1	1
26	1	0	2	1	3	3	2	1	1	2	2	1	1	2	1	1	1	1	2	2	99	99	99	99	99	99	99	99	99	99	99	1	3	99	99	99	99	99	99	99	99	99	99	2	1	1	2	2	2
32	1	0	1	1	3	1	2	4	1	2	2	1	1	2	1	2	1	1	4	99	99	99	99	99	99	99	99	99	99	99	99	99	2	1	2	2	2	1	2	1	2	1	1	1	1	2	2	2	1
18	1	0	2	1	3	2	2	1	1	2	2	2	1	2	1	2	1	1	2	2	99	99	99	99	99	99	99	99	99	99	99	1	5	99	99	99	99	99	99	99	99	99	99	1	1	2	1	1	1
26	1	0	2	1	3	3	2	1	1	2	2	1	1	2	1	1	1	1	2	2	99	99	99	99	99	99	99	99	99	99	99	1	3	99	99	99	99	99	99	99	99	99	99	2	1	1	2	2	2
32	1	0	2	1	3	2	2	4	1	2	2	1	1	2	1	2	1	1	4	99	99	99	99	99	99	99	99	99	99	99	99	99	2	1	2	2	2	1	2	1	2	1	1	1	1	2	2	2	1
18	1	0	2	1	3	2	2	1	1	2	2	2	1	2	1	2	1	1	2	2	99	99	99	99	99	99	99	99	99	99	99	1	5	99	99	99	99	99	99	99	99	99	99	1	1	2	1	1	1
26	1	0	2	1	3	2	2	1	1	2	2	1	1	2	1	1	1	1	2	2	99	99	99	99	99	99	99	99	99	99	99	1	3	99	99	99	99	99	99	99	99	99	99	2	1	1	2	2	2
18	1	0	2	1	3	1	2	1	1	2	2	2	1	2	1	2	1	1	2	2	99	99	99	99	99	99	99	99	99	99	99	1	5	99	99	99	99	99	99	99	99	99	99	1	1	2	1	1	1
26	1	0	2	1	3	1	2	1	1	2	2	1	1	2	1	1	1	1	2	2	99	99	99	99	99	99	99	99	99	99	99	1	3	99	99	99	99	99	99	99	99	99	99	2	1	1	2	2	2
32	1	0	2	1	3	1	2	4	1	2	2	1	1	2	1	2	1	1	4	99	99	99	99	99	99	99	99	99	99	99	99	99	2	1	2	2	2	1	2	1	2	1	1	1	1	2	2	2	1
18	1	0	2	1	3	1	2	1	1	2	2	2	1	2	1	2	1	1	2	2	99	99	99	99	99	99	99	99	99	99	99	1	5	99	99	99	99	99	99	99	99	99	99	1	1	2	1	1	1
26	1	0	2	1	3	1	2	1	1	2	2	1	1	2	2	1	1	1	2	2	99	99	99	99	99	99	99	99	99	99	99	1	3	99	99	99	99	99	99	99	99	99	99	2	1	1	2	2	2
32	1	0	1	1	3	2	2	4	1	2	2	1	1	2	2	2	1	1	4	99	99	99	99	99	99	99	99	99	99	99	99	99	2	1	2	2	2	1	2	1	2	1	1	1	1	2	2	2	1
18	1	0	2	1	3	2	2	1	1	2	2	2	1	2	1	2	1	1	2	2	99	99	99	99	99	99	99	99	99	99	99	1	5	99	99	99	99	99	99	99	99	99	99	1	1	2	1	1	1
26	1	0	2	1	3	3	2	1	1	2	2	1	1	2	2	1	1	1	2	2	99	99	99	99	99	99	99	99	99	99	99	1	3	99	99	99	99	99	99	99	99	99	99	2	1	1	2	2	2
32	1	0	2	1	3	2	2	4	1	2	2	1	1	2	1	2	1	1	4	99	99	99	99	99	99	99	99	99	99	99	99	99	2	1	2	2	2	1	2	1	2	1	1	1	1	2	2	2	1
18	1	0	2	1	3	3	2	1	1	2	2	2	1	2	2	2	1	1	2	2	99	99	99	99	99	99	99	99	99	99	99	1	5	99	99	99	99	99	99	99	99	99	99	1	1	2	1	1	1
26	1	0	2	1	3	3	2	1	1	2	2	1	1	2	1	1	1	1	2	2	99	99	99	99	99	99	99	99	99	99	99	1	3	99	99	99	99	99	99	99	99	99	99	2	1	1	2	2	2
32	1	0	2	1	3	2	2	4	1	2	2	1	1	2	1	2	1	1	4	99	99	99	99	99	99	99	99	99	99	99	99	99	2	1	2	2	2	1	2	1	2	1	1	1	1	2	2	2	1
18	1	0	2	1	3	1	2	1	1	2	2	2	1	2	2	2	1	1	2	2	99	99	99	99	99	99	99	99	99	99	99	1	5	99	99	99	99	99	99	99	99	99	99	1	1	2	1	1	1
26	1	0	2	1	3	1	2	1	1	2	2	1	1	2	1	1	1	1	2	2	99	99	99	99	99	99	99	99	99	99	99	1	3	99	99	99	99	99	99	99	99	99	99	2	1	1	2	2	2
24	1	0	2	1	3	1	1	1	1	2	3	1	1	2	2	1	1	1	1	2	99	99	99	99	99	99	99	99	99	99	99	1	3	99	99	99	99	99	99	99	99	99	99	1	1	2	1	2	2
24	1	0	1	1	3	1	1	1	1	2	3	1	1	2	2	1	1	1	1	2	99	99	99	99	99	99	99	99	99	99	99	1	3	99	99	99	99	99	99	99	99	99	99	1	1	2	1	2	2
24	1	0	2	1	3	3	1	1	1	2	3	1	1	2	2	1	1	1	1	2	99	99	99	99	99	99	99	99	99	99	99	1	3	99	99	99	99	99	99	99	99	99	99	1	1	2	1	2	2
24	1	0	1	1	3	2	1	1	1	2	3	1	1	2	2	1	1	1	1	2	99	99	99	99	99	99	99	99	99	99	99	1	3	99	99	99	99	99	99	99	99	99	99	1	1	2	1	2	2
24	1	0	2	1	3	2	1	1	1	2	3	1	1	2	2	1	1	1	1	2	99	99	99	99	99	99	99	99	99	99	99	1	3	99	99	99	99	99	99	99	99	99	99	1	1	2	1	2	2
24	1	0	2	1	3	1	1	1	1	2	3	1	1	2	2	1	1	1	1	2	99	99	99	99	99	99	99	99	99	99	99	1	3	99	99	99	99	99	99	99	99	99	99	1	1	2	1	2	2
24	1	0	2	1	3	1	1	1	1	2	3	1	1	2	2	1	1	1	1	2	99	99	99	99	99	99	99	99	99	99	99	1	3	99	99	99	99	99	99	99	99	99	99	1	1	2	1	2	2
24	1	0	2	1	3	2	1	1	1	2	3	1	1	2	2	1	1	1	1	2	99	99	99	99	99	99	99	99	99	99	99	1	3	99	99	99	99	99	99	99	99	99	99	1	1	2	1	2	2
24	1	0	2	1	3	1	1	1	1	2	3	1	1	2	2	1	1	1	1	2	99	99	99	99	99	99	99	99	99	99	99	1	3	99	99	99	99	99	99	99	99	99	99	1	1	2	1	2	2
24	1	0	2	1	2	1	1	1	1	2	3	1	1	2	2	1	1	1	1	2	99	99	99	99	99	99	99	99	99	99	99	1	3	99	99	99	99	99	99	99	99	99	99	1	1	2	1	2	2
34	1	0	1	2	3	1	2	5	1	3	1	1	1	2	2	2	1	2	4	99	99	99	99	99	99	99	99	99	99	99	99	99	2	1	1	2	1	2	2	1	2	2	1	1	1	2	2	2	2
36	1	0	2	1	1	2	2	4	1	3	1	1	1	2	1	1	1	2	4	99	99	99	99	99	99	99	99	99	99	99	99	99	2	1	2	2	2	1	2	1	2	2	1	1	1	2	2	2	2
31	1	0	2	1	3	2	1	4	1	3	1	1	1	2	2	1	1	1	4	99	99	99	99	99	99	99	99	99	99	99	99	99	2	1	1	1	2	2	2	1	1	1	1	1	1	2	2	2	2
30	1	0	2	1	3	2	1	4	1	3	1	1	1	2	2	1	1	1	1	2	99	99	99	99	99	99	99	99	99	99	99	1	3	1	2	2	2	2	2	1	2	1	1	1	1	2	1	1	2
34	1	0	2	3	3	2	1	5	1	3	1	1	1	2	1	1	1	1	1	2	99	99	99	99	99	99	99	99	99	99	99	1	1	99	99	99	99	99	99	99	99	99	99	1	1	2	2	2	2
34	1	0	2	1	3	3	2	5	1	3	1	1	1	2	1	2	1	2	4	99	99	99	99	99	99	99	99	99	99	99	99	99	2	1	1	2	1	2	2	1	2	2	1	1	1	2	2	2	2
36	1	0	2	1	3	3	2	4	1	3	1	1	1	2	1	1	1	2	4	99	99	99	99	99	99	99	99	99	99	99	99	99	2	1	2	2	2	1	2	1	2	2	1	1	1	2	2	2	2
31	1	0	2	1	3	2	1	4	1	3	1	1	1	2	2	1	1	1	4	99	99	99	99	99	99	99	99	99	99	99	99	99	2	1	1	1	2	2	2	1	1	1	1	1	1	2	2	2	2
30	1	0	2	1	3	3	1	4	1	3	1	1	1	2	2	1	1	1	1	2	99	99	99	99	99	99	99	99	99	99	99	1	3	1	2	2	2	2	2	1	2	1	1	1	1	2	1	1	2
34	1	0	4	1	2	3	1	5	1	3	1	1	1	2	1	1	1	1	1	2	99	99	99	99	99	99	99	99	99	99	99	1	1	99	99	99	99	99	99	99	99	99	99	1	1	2	2	2	2
34	1	0	2	1	3	1	2	5	1	3	1	1	1	2	1	2	1	2	4	99	99	99	99	99	99	99	99	99	99	99	99	99	2	1	1	2	1	2	2	1	2	2	1	1	1	2	2	2	2
36	1	0	2	1	3	1	2	4	1	3	1	1	1	2	1	1	1	2	4	99	99	99	99	99	99	99	99	99	99	99	99	99	2	1	2	2	2	1	2	1	2	2	1	1	1	2	2	2	2
31	1	0	1	1	3	1	1	4	1	3	1	1	1	2	2	1	1	1	4	99	99	99	99	99	99	99	99	99	99	99	99	99	2	1	1	1	2	2	2	1	1	1	1	1	1	2	2	2	2
30	1	0	2	1	3	1	1	4	1	3	1	1	1	2	2	1	1	1	1	2	99	99	99	99	99	99	99	99	99	99	99	1	3	1	2	2	2	2	2	1	2	1	1	1	1	2	1	1	2
34	1	0	2	1	2	1	1	5	1	3	1	1	1	2	2	1	1	1	1	2	99	99	99	99	99	99	99	99	99	99	99	1	1	99	99	99	99	99	99	99	99	99	99	1	1	2	2	2	2
34	1	0	2	1	3	1	2	5	1	3	1	1	1	2	2	2	1	2	4	99	99	99	99	99	99	99	99	99	99	99	99	99	2	1	1	2	1	2	2	1	2	2	1	1	1	2	2	2	2
36	1	0	2	3	3	1	2	4	1	3	1	1	1	2	1	1	1	2	4	99	99	99	99	99	99	99	99	99	99	99	99	99	2	1	2	2	2	1	2	1	2	2	1	1	1	2	2	2	2
31	1	0	2	1	2	1	1	4	1	3	1	1	1	2	2	1	1	1	4	99	99	99	99	99	99	99	99	99	99	99	99	99	2	1	1	1	2	2	2	1	1	1	1	1	1	2	2	2	2
30	1	0	2	1	3	1	1	4	1	3	1	1	1	2	2	1	1	1	1	2	99	99	99	99	99	99	99	99	99	99	99	1	3	1	2	2	2	2	2	1	2	1	1	1	1	2	1	1	2
34	1	0	2	1	3	1	1	5	1	3	1	1	1	2	1	1	1	1	1	2	99	99	99	99	99	99	99	99	99	99	99	1	1	99	99	99	99	99	99	99	99	99	99	1	1	2	2	2	2
34	1	0	2	1	3	1	2	5	1	3	1	1	1	2	1	2	1	2	4	99	99	99	99	99	99	99	99	99	99	99	99	99	2	1	1	2	1	2	2	1	2	2	1	1	1	2	2	2	2
36	1	0	2	1	3	3	2	4	1	3	1	1	1	2	2	1	1	2	4	99	99	99	99	99	99	99	99	99	99	99	99	99	2	1	2	2	2	1	2	1	2	2	1	1	1	2	2	2	2
31	1	0	2	1	3	1	1	4	1	3	1	1	1	2	2	1	1	1	4	99	99	99	99	99	99	99	99	99	99	99	99	99	2	1	1	1	2	2	2	1	1	1	1	1	1	2	2	2	2
30	1	0	2	5	4	1	1	4	1	3	1	1	1	2	2	1	1	1	1	2	99	99	99	99	99	99	99	99	99	99	99	1	3	1	2	2	2	2	2	1	2	1	1	1	1	2	1	1	2
34	1	0	2	1	3	1	1	5	1	3	1	1	1	2	2	1	1	1	1	2	99	99	99	99	99	99	99	99	99	99	99	1	1	99	99	99	99	99	99	99	99	99	99	1	1	2	2	2	2
34	1	0	2	4	3	1	2	5	1	3	1	1	1	2	1	2	1	2	4	99	99	99	99	99	99	99	99	99	99	99	99	99	2	1	1	2	1	2	2	1	2	2	1	1	1	2	2	2	2
36	1	0	2	1	3	1	2	4	1	3	1	1	1	2	1	1	1	2	4	99	99	99	99	99	99	99	99	99	99	99	99	99	2	1	2	2	2	1	2	1	2	2	1	1	1	2	2	2	2
34	1	0	2	1	3	2	2	5	1	3	1	1	1	2	1	2	1	2	4	99	99	99	99	99	99	99	99	99	99	99	99	99	2	1	1	2	1	2	2	1	2	2	1	1	1	2	2	2	2
36	1	0	2	1	3	2	2	4	1	3	1	1	1	2	1	1	1	2	4	99	99	99	99	99	99	99	99	99	99	99	99	99	2	1	2	2	2	1	2	1	2	2	1	1	1	2	2	2	2
34	1	0	2	1	3	2	2	5	1	3	1	1	1	2	1	2	1	2	4	99	99	99	99	99	99	99	99	99	99	99	99	99	2	1	1	2	1	2	2	1	2	2	1	1	1	2	2	2	2
36	1	0	2	1	3	3	2	4	1	3	1	1	1	2	1	1	1	2	4	99	99	99	99	99	99	99	99	99	99	99	99	99	2	1	2	2	2	1	2	1	2	2	1	1	1	2	2	2	2
34	1	0	2	1	3	1	2	5	1	3	1	1	1	2	1	2	1	2	4	99	99	99	99	99	99	99	99	99	99	99	99	99	2	1	1	2	1	2	2	1	2	2	1	1	1	2	2	2	2
36	1	0	2	1	3	1	2	4	1	3	1	1	1	2	1	1	1	2	4	99	99	99	99	99	99	99	99	99	99	99	99	99	2	1	2	2	2	1	2	1	2	2	1	1	1	2	2	2	2
23	1	0	2	1	3	1	2	2	1	3	2	1	1	2	1	1	1	1	1	2	99	99	99	99	99	99	99	99	99	99	99	99	1	99	99	99	99	99	99	99	99	99	99	1	1	2	2	2	1
30	1	0	2	5	4	3	1	2	1	3	2	1	1	2	2	2	1	1	2	2	99	99	99	99	99	99	99	99	99	99	99	99	5	99	99	99	99	99	99	99	99	99	99	1	1	2	1	2	2
32	1	0	1	1	3	1	2	3	1	3	2	1	1	2	2	1	1	1	2	2	99	99	99	99	99	99	99	99	99	99	99	1	5	99	99	99	99	99	99	99	99	99	99	1	1	2	2	2	2
23	1	0	2	1	3	1	2	2	1	3	2	1	1	2	1	1	1	1	1	2	99	99	99	99	99	99	99	99	99	99	99	99	1	99	99	99	99	99	99	99	99	99	99	1	1	2	2	2	1
30	1	0	2	1	3	1	1	2	1	3	2	1	1	2	1	2	1	1	2	2	99	99	99	99	99	99	99	99	99	99	99	99	5	99	99	99	99	99	99	99	99	99	99	1	1	2	1	2	2
32	1	0	2	1	3	1	2	3	1	3	2	1	1	2	2	1	1	1	2	2	99	99	99	99	99	99	99	99	99	99	99	1	5	99	99	99	99	99	99	99	99	99	99	1	1	2	2	2	2
23	1	0	2	1	3	2	2	2	1	3	2	1	1	2	1	1	1	1	1	2	99	99	99	99	99	99	99	99	99	99	99	99	1	99	99	99	99	99	99	99	99	99	99	1	1	2	2	2	1
30	1	0	2	1	1	1	1	2	1	3	2	1	1	2	2	2	1	1	2	2	99	99	99	99	99	99	99	99	99	99	99	99	5	99	99	99	99	99	99	99	99	99	99	1	1	2	1	2	2
32	1	0	1	1	3	1	2	3	1	3	2	1	1	2	1	1	1	1	2	2	99	99	99	99	99	99	99	99	99	99	99	1	5	99	99	99	99	99	99	99	99	99	99	1	1	2	2	2	2
23	1	0	2	1	3	1	2	2	1	3	2	1	1	2	1	1	1	1	1	2	99	99	99	99	99	99	99	99	99	99	99	99	1	99	99	99	99	99	99	99	99	99	99	1	1	2	2	2	1
30	1	0	2	1	3	1	1	2	1	3	2	1	1	2	1	2	1	1	2	2	99	99	99	99	99	99	99	99	99	99	99	99	5	99	99	99	99	99	99	99	99	99	99	1	1	2	1	2	2
32	1	0	2	1	3	1	2	3	1	3	2	1	1	2	1	1	1	1	2	2	99	99	99	99	99	99	99	99	99	99	99	1	5	99	99	99	99	99	99	99	99	99	99	1	1	2	2	2	2
23	1	0	2	3	3	2	2	2	1	3	2	1	1	2	2	1	1	1	1	2	99	99	99	99	99	99	99	99	99	99	99	99	1	99	99	99	99	99	99	99	99	99	99	1	1	2	2	2	1
30	1	0	2	1	3	1	1	2	1	3	2	1	1	2	2	2	1	1	2	2	99	99	99	99	99	99	99	99	99	99	99	99	5	99	99	99	99	99	99	99	99	99	99	1	1	2	1	2	2
32	1	0	2	1	3	1	2	3	1	3	2	1	1	2	2	1	1	1	2	2	99	99	99	99	99	99	99	99	99	99	99	1	5	99	99	99	99	99	99	99	99	99	99	1	1	2	2	2	2
30	1	0	2	1	3	1	1	2	1	3	2	1	1	2	2	2	1	1	2	2	99	99	99	99	99	99	99	99	99	99	99	99	5	99	99	99	99	99	99	99	99	99	99	1	1	2	1	2	2
32	1	0	2	1	3	1	2	3	1	3	2	1	1	2	2	1	1	1	2	2	99	99	99	99	99	99	99	99	99	99	99	1	5	99	99	99	99	99	99	99	99	99	99	1	1	2	2	2	2
23	1	0	2	1	3	3	2	2	1	3	2	1	1	2	1	1	1	1	1	2	99	99	99	99	99	99	99	99	99	99	99	99	1	99	99	99	99	99	99	99	99	99	99	1	1	2	2	2	1
30	1	0	2	1	3	2	1	2	1	3	2	1	1	2	2	2	1	1	2	2	99	99	99	99	99	99	99	99	99	99	99	99	5	99	99	99	99	99	99	99	99	99	99	1	1	2	1	2	2
32	1	0	2	1	3	3	2	3	1	3	2	1	1	2	1	1	1	1	2	2	99	99	99	99	99	99	99	99	99	99	99	1	5	99	99	99	99	99	99	99	99	99	99	1	1	2	2	2	2
23	1	0	2	2	2	1	2	2	1	3	2	1	1	2	2	1	1	1	1	2	99	99	99	99	99	99	99	99	99	99	99	99	1	99	99	99	99	99	99	99	99	99	99	1	1	2	2	2	1
30	1	0	2	1	3	1	1	2	1	3	2	1	1	2	1	2	1	1	2	2	99	99	99	99	99	99	99	99	99	99	99	99	5	99	99	99	99	99	99	99	99	99	99	1	1	2	1	2	2
32	1	0	2	1	1	1	2	3	1	3	2	1	1	2	2	1	1	1	2	2	99	99	99	99	99	99	99	99	99	99	99	1	5	99	99	99	99	99	99	99	99	99	99	1	1	2	2	2	2
23	1	0	2	1	3	1	2	2	1	3	2	1	1	2	1	1	1	1	1	2	99	99	99	99	99	99	99	99	99	99	99	99	1	99	99	99	99	99	99	99	99	99	99	1	1	2	2	2	1
30	1	0	2	1	3	1	1	2	1	3	2	1	1	2	1	2	1	1	2	2	99	99	99	99	99	99	99	99	99	99	99	99	5	99	99	99	99	99	99	99	99	99	99	1	1	2	1	2	2
32	1	0	2	1	3	1	2	3	1	3	2	1	1	2	2	1	1	1	2	2	99	99	99	99	99	99	99	99	99	99	99	1	5	99	99	99	99	99	99	99	99	99	99	1	1	2	2	2	2
23	1	0	2	2	3	2	2	2	1	3	2	1	1	2	1	1	1	1	1	2	99	99	99	99	99	99	99	99	99	99	99	99	1	99	99	99	99	99	99	99	99	99	99	1	1	2	2	2	1
32	1	0	2	1	3	2	2	4	1	4	1	1	1	2	1	1	1	1	4	99	99	99	99	99	99	99	99	99	99	99	99	1	1	99	99	99	99	99	99	99	99	99	99	1	1	2	2	2	2
32	1	0	2	1	3	2	2	4	1	4	1	1	1	2	2	1	1	1	1	2	99	99	99	99	99	99	99	99	99	99	99	1	1	99	99	99	99	99	99	99	99	99	99	1	1	2	2	2	2
32	1	0	2	3	3	1	2	4	1	4	1	1	1	2	1	1	1	1	4	99	99	99	99	99	99	99	99	99	99	99	99	1	1	99	99	99	99	99	99	99	99	99	99	1	1	2	2	2	2
32	1	0	2	1	3	1	2	4	1	4	1	1	1	2	2	1	1	1	4	99	99	299	99	99	99	99	99	99	99	99	99	1	1	99	99	99	99	99	99	99	99	99	99	1	1	2	2	2	2
25	1	0	2	3	2	1	2	3	1	4	2	1	1	2	1	1	1	1	2	99	99	99	99	99	99	99	99	99	99	99	99	99	3	99	99	99	99	99	99	99	99	99	99	1	1	2	2	2	2
22	1	0	2	1	3	1	1	2	1	4	2	1	1	2	2	1	1	1	1	2	99	99	99	99	99	99	99	99	99	99	99	99	3	99	99	99	99	99	99	99	99	99	99	1	1	2	2	2	2
40	1	0	2	3	3	2	2	8	1	4	2	1	1	2	1	1	1	1	4	99	99	99	99	99	99	99	99	99	99	99	99	99	2	1	2	2	1	2	2	1	2	2	1	1	1	2	2	2	2
25	1	0	2	3	3	1	2	3	1	4	2	1	1	2	1	1	1	1	2	99	99	99	99	99	99	99	99	99	99	99	99	99	3	99	99	99	99	99	99	99	99	99	99	1	1	2	2	2	2
22	1	0	3	1	3	1	1	2	1	4	2	1	1	2	1	1	1	1	1	2	99	99	99	99	99	99	99	99	99	99	99	99	3	99	99	99	99	99	99	99	99	99	99	1	1	2	2	2	2
40	1	0	2	1	3	3	2	8	1	4	2	1	1	2	1	1	1	1	4	99	99	99	99	99	99	99	99	99	99	99	99	99	2	1	2	2	1	2	2	1	2	2	1	1	1	2	2	2	2
28	1	0	2	1	3	1	2	2	1	4	2	1	1	2	1	1	1	2	4	99	99	99	99	99	99	99	99	99	99	99	99	99	3	99	99	99	99	99	99	99	99	99	99	1	1	2	2	1	2
25	1	0	2	1	3	2	2	3	1	4	2	1	1	2	1	1	1	1	2	99	99	99	99	99	99	99	99	99	99	99	99	99	3	99	99	99	99	99	99	99	99	99	99	1	1	2	2	2	2
22	1	0	3	2	3	3	1	2	1	4	2	1	1	2	1	1	1	1	4	99	99	99	99	99	99	99	99	99	99	99	99	99	3	99	99	99	99	99	99	99	99	99	99	1	1	2	2	2	2
40	1	0	2	3	3	1	2	8	1	4	2	1	1	2	2	1	1	1	4	99	99	99	99	99	99	99	99	99	99	99	99	99	2	1	2	2	1	2	2	1	2	2	1	1	1	2	2	2	2
28	1	0	2	1	3	3	2	2	1	4	2	1	1	2	1	1	1	2	4	99	99	99	99	99	99	99	99	99	99	99	99	99	3	99	99	99	99	99	99	99	99	99	99	1	1	2	2	1	2
25	1	0	2	3	3	1	2	3	1	4	2	1	1	2	2	1	1	1	2	99	99	99	99	99	99	99	99	99	99	99	99	99	3	99	99	99	99	99	99	99	99	99	99	1	1	2	2	2	2
22	1	0	2	1	3	1	1	2	1	4	2	1	1	2	1	1	1	1	4	99	99	99	99	99	99	99	99	99	99	99	99	99	3	99	99	99	99	99	99	99	99	99	99	1	1	2	2	2	2
40	1	0	2	1	3	2	2	8	1	4	2	1	1	2	1	1	1	1	4	99	99	99	99	99	99	99	99	99	99	99	99	99	2	1	2	2	1	2	2	1	2	2	1	1	1	2	2	2	2
28	1	0	2	3	3	1	2	2	1	4	2	1	1	2	1	1	1	2	4	99	99	99	99	99	99	99	99	99	99	99	99	99	3	99	99	99	99	99	99	99	99	99	99	1	1	2	2	1	2
25	1	0	2	1	3	2	2	3	1	4	2	1	1	2	1	1	1	1	2	99	99	99	99	99	99	99	99	99	99	99	99	99	3	99	99	99	99	99	99	99	99	99	99	1	1	2	2	2	2
22	1	0	2	1	3	3	1	2	1	4	2	1	1	2	1	1	1	1	1	2	99	99	99	99	99	99	99	99	99	99	99	99	3	99	99	99	99	99	99	99	99	99	99	1	1	2	2	2	2
40	1	0	2	3	3	1	2	8	1	4	2	1	1	2	1	1	1	1	4	99	99	99	99	99	99	99	99	99	99	99	99	99	2	1	2	2	1	2	2	1	2	2	1	1	1	2	2	2	2
28	1	0	2	1	3	3	2	2	1	4	2	1	1	2	1	1	1	2	4	99	99	99	99	99	99	99	99	99	99	99	99	99	3	99	99	99	99	99	99	99	99	99	99	1	1	2	2	1	2
28	1	0	2	1	3	1	2	2	1	4	2	1	1	2	2	1	1	2	4	99	99	99	99	99	99	99	99	99	99	99	99	99	3	99	99	99	99	99	99	99	99	99	99	1	1	2	2	1	2
25	1	0	2	1	3	3	2	3	1	4	2	1	1	2	1	1	1	1	2	99	99	99	99	99	99	99	99	99	99	99	99	99	3	99	99	99	99	99	99	99	99	99	99	1	1	2	2	2	2
28	1	0	2	3	3	2	2	2	1	4	2	1	1	2	2	1	1	2	4	99	99	99	99	99	99	99	99	99	99	99	99	99	3	99	99	99	99	99	99	99	99	99	99	1	1	2	2	1	2
25	1	0	2	1	3	1	2	3	1	4	2	1	1	2	1	1	1	1	4	99	99	99	99	99	99	99	99	99	99	99	99	99	3	99	99	99	99	99	99	99	99	99	99	1	1	2	2	2	2
28	1	0	2	4	4	3	2	2	1	4	2	1	1	2	2	1	1	2	4	99	99	99	99	99	99	99	99	99	99	99	99	99	3	99	99	99	99	99	99	99	99	99	99	1	1	2	2	1	2
25	1	0	2	1	3	1	2	3	1	4	2	1	1	2	1	1	1	1	2	99	99	99	99	99	99	99	99	99	99	99	99	99	3	99	99	99	99	99	99	99	99	99	99	1	1	2	2	2	2
22	1	0	2	4	3	1	1	2	1	4	2	1	1	2	1	1	1	1	4	99	99	99	99	99	99	99	99	99	99	99	99	99	3	99	99	99	99	99	99	99	99	99	99	1	1	2	2	2	2
25	1	0	2	1	3	2	2	3	1	4	2	1	1	2	1	1	1	1	4	99	99	99	99	99	99	99	99	99	99	99	99	99	3	99	99	99	99	99	99	99	99	99	99	1	1	2	2	2	2
22	1	0	2	4	3	3	1	2	1	4	2	1	1	2	2	1	1	1	4	99	99	99	99	99	99	99	99	99	99	99	99	99	3	99	99	99	99	99	99	99	99	99	99	1	1	2	2	2	2
42	1	0	1	3	3	2	2	8	1	4	5	1	1	2	1	1	1	1	4	99	99	99	99	99	99	99	99	99	99	99	99	99	2	99	99	99	99	99	99	99	99	99	99	1	1	2	2	2	1
42	1	0	2	1	3	3	2	8	1	4	5	1	1	2	2	1	1	1	4	99	99	99	99	99	99	99	99	99	99	99	99	99	2	99	99	99	99	99	99	99	99	99	99	1	1	2	2	2	1
42	1	0	2	1	3	1	2	8	1	4	5	1	1	2	1	1	1	1	4	99	99	99	99	99	99	99	99	99	99	99	99	99	2	99	99	99	99	99	99	99	99	99	99	1	1	2	2	2	1
42	1	0	2	5	3	3	2	8	1	4	5	1	1	2	1	1	1	1	4	99	99	99	99	99	99	99	99	99	99	99	99	99	2	99	99	99	99	99	99	99	99	99	99	1	1	2	2	2	1
42	1	0	2	1	3	1	2	8	1	4	5	1	1	2	1	1	1	1	4	99	99	99	99	99	99	99	99	99	99	99	99	99	2	99	99	99	99	99	99	99	99	99	99	1	1	2	2	2	1
42	1	0	2	1	3	2	2	8	1	4	5	1	1	2	2	1	1	1	4	99	99	99	99	99	99	99	99	99	99	99	99	99	2	99	99	99	99	99	99	99	99	99	99	1	1	2	2	2	1
42	1	0	2	1	2	3	2	8	1	4	5	1	1	2	1	1	1	1	4	99	99	99	99	99	99	99	99	99	99	99	99	99	2	99	99	99	99	99	99	99	99	99	99	1	1	2	2	2	1
29	1	0	4	1	3	1	2	2	1	5	1	1	1	2	2	1	1	1	4	99	99	99	99	99	99	99	99	99	99	99	99	99	2	1	2	2	1	2	2	1	2	2	1	1	1	2	2	1	2
29	1	0	1	5	2	3	2	2	1	5	1	1	1	2	1	1	1	1	4	99	99	99	99	99	99	99	99	99	99	99	99	99	2	1	2	2	1	2	2	1	2	2	1	1	1	2	2	1	2
29	1	0	2	1	3	1	2	2	1	5	1	1	1	2	1	1	1	1	4	99	99	99	99	99	99	99	99	99	99	99	99	99	2	1	2	2	1	2	2	1	2	2	1	1	1	2	2	1	2
29	1	0	2	1	2	2	2	2	1	5	1	1	1	2	1	1	1	1	4	99	99	99	99	99	99	99	99	99	99	99	99	99	2	1	2	2	1	2	2	1	2	2	1	1	1	2	2	1	2
29	1	0	2	1	3	2	2	2	1	5	1	1	1	2	1	1	1	1	4	99	99	99	99	99	99	99	99	99	99	99	99	99	2	1	2	2	1	2	2	1	2	2	1	1	1	2	2	1	2
29	1	0	2	3	3	1	2	2	1	5	1	1	1	2	1	1	1	1	4	99	99	99	99	99	99	99	99	99	99	99	99	99	2	1	2	2	1	2	2	1	2	2	1	1	1	2	2	1	2
29	1	0	2	1	3	1	2	2	1	5	1	1	1	2	1	1	1	1	4	99	99	99	99	99	99	99	99	99	99	99	99	99	2	1	2	2	1	2	2	1	2	2	1	1	1	2	2	1	2
34	1	0	2	3	3	1	1	3	1	6	1	1	1	2	1	1	1	1	4	99	99	99	99	99	99	99	99	99	99	99	99	99	2	1	2	2	1	2	2	1	2	2	1	1	1	2	2	2	2
36	1	0	2	1	3	1	1	3	1	6	1	1	1	2	1	1	1	1	4	99	99	99	99	99	99	99	99	99	99	99	99	99	2	1	2	2	1	2	2	1	2	2	1	1	1	2	1	1	1
20	1	0	2	3	3	1	2	1	1	6	1	1	1	2	1	1	1	1	4	99	99	99	99	99	99	99	99	99	99	99	99	99	2	1	2	2	1	2	2	1	1	2	1	1	1	2	2	2	2
34	1	0	4	1	3	1	1	3	1	6	1	1	1	2	1	1	1	1	4	99	99	99	99	99	99	99	99	99	99	99	99	99	2	1	2	2	1	2	2	1	2	2	1	1	1	2	2	2	2
36	1	0	2	1	3	1	1	3	1	6	1	1	1	2	2	1	1	1	4	99	99	99	99	99	99	99	99	99	99	99	99	99	2	1	2	2	1	2	2	1	2	2	1	1	1	2	1	1	1
20	1	0	1	1	3	2	2	1	1	6	1	1	1	2	1	1	1	1	4	99	99	99	99	99	99	99	99	99	99	99	99	99	2	1	2	2	1	2	2	1	1	2	1	1	1	2	2	2	2
34	1	0	2	1	3	2	1	3	1	6	1	1	1	2	1	1	1	2	4	99	99	99	99	99	99	99	99	99	99	99	99	99	2	1	2	2	1	2	2	1	2	2	1	1	1	2	2	2	2
20	1	0	2	1	3	1	2	1	1	6	1	1	1	2	1	1	1	1	4	99	99	99	99	99	99	99	99	99	99	99	99	99	2	1	2	2	1	2	2	1	1	2	1	1	1	2	2	2	2
20	1	0	2	3	3	1	2	1	1	6	1	1	1	2	1	1	1	1	4	99	99	99	99	99	99	99	99	99	99	99	99	99	2	1	2	2	1	2	2	1	1	2	1	1	1	2	2	2	2
34	1	0	2	3	3	1	1	3	1	6	1	1	1	2	1	1	1	2	4	99	99	99	99	99	99	99	99	99	99	99	99	99	2	1	2	2	1	2	2	1	2	2	1	1	1	2	2	2	2
20	1	0	2	1	3	2	2	1	1	6	1	1	1	2	1	1	1	1	4	99	99	99	99	99	99	99	99	99	99	99	99	99	2	1	2	2	1	2	2	1	1	2	1	1	1	2	2	2	2
34	1	0	2	1	3	2	1	3	1	6	1	1	1	2	1	1	1	1	4	99	99	99	99	99	99	99	99	99	99	99	99	99	2	1	2	2	1	2	2	1	2	2	1	1	1	2	2	2	2
14	2	1	2	1	3	2	1	1	1	4	1	1	1	2	1	1	1	1	1	1	2	2	1	2	2	2	2	1	2	1	2	99	1	99	99	99	99	99	99	99	99	99	99	1	1	2	1	1	1
31	2	1	2	2	3	1	1	1	1	4	1	1	1	2	1	1	1	1	2	1	1	2	1	2	2	2	2	2	2	2	2	99	5	1	2	2	1	1	2	1	2	2	1	1	1	2	1	2	2
23	2	1	2	1	3	1	2	2	1	4	1	1	1	2	1	1	1	1	4	99	99	2	1	2	1	1	2	2	2	2	2	99	3	99	99	99	99	99	99	99	99	99	99	2	1	2	1	2	2
27	2	1	2	1	2	1	1	1	1	4	1	1	1	2	1	2	1	1	4	99	99	2	1	2	2	2	2	2	2	2	2	99	3	99	99	99	99	99	99	99	99	99	99	2	1	1	2	1	1
31	2	1	2	4	3	1	1	1	1	4	1	1	1	2	1	1	1	1	2	1	1	2	1	2	2	2	2	2	2	2	2	99	5	1	2	2	1	1	2	1	2	2	1	1	1	2	1	2	2
31	2	1	2	1	3	1	1	1	1	4	1	1	1	2	1	1	1	1	2	1	1	2	1	2	2	2	2	2	2	2	2	99	5	1	2	2	1	1	2	1	2	2	1	1	1	2	1	2	2
14	2	1	2	1	3	1	1	1	1	4	1	1	1	2	2	1	1	1	4	99	99	2	1	2	2	2	2	1	2	1	2	99	1	99	99	99	99	99	99	99	99	99	99	1	1	2	1	1	1
14	2	1	2	3	2	1	1	1	1	4	1	1	1	2	1	1	1	1	4	99	99	2	1	2	2	2	2	1	2	1	2	99	1	99	99	99	99	99	99	99	99	99	99	1	1	2	1	1	1
33	2	1	2	1	2	2	2	3	1	4	1	1	1	2	2	1	1	1	4	99	99	2	1	2	1	2	2	2	2	2	2	99	1	99	99	99	99	99	99	99	99	99	99	2	1	2	2	2	2
33	2	1	2	4	2	2	2	3	1	4	2	1	1	2	1	1	1	1	1	1	1	2	1	2	1	2	2	2	2	2	2	99	1	99	99	99	99	99	99	99	99	99	99	2	1	2	2	2	2
31	2	1	2	4	1	2	1	1	1	4	2	1	1	2	1	1	1	1	4	99	1	2	1	2	2	2	2	2	2	2	2	99	5	1	2	2	1	1	2	1	2	2	1	1	1	2	1	2	2
31	2	1	2	1	2	1	1	1	1	4	2	1	1	2	2	1	1	1	2	1	1	2	1	2	2	2	2	2	2	2	2	99	5	1	2	2	1	1	2	1	2	2	1	1	1	2	1	2	2
31	2	1	2	1	3	2	1	1	1	4	2	1	1	2	1	1	1	1	2	1	1	2	1	2	2	2	2	2	2	2	2	99	5	1	2	2	1	1	2	1	2	2	1	1	1	2	1	2	2
33	2	1	2	1	3	2	2	3	1	4	2	1	1	2	2	1	1	1	4	99	99	2	1	2	1	2	2	2	2	2	2	99	1	99	99	99	99	99	99	99	99	99	99	1	1	2	2	2	2
34	2	1	2	1	3	2	2	3	1	5	1	1	1	2	2	1	1	1	2	1	1	2	1	2	1	2	2	2	1	2	2	99	5	99	99	99	99	99	99	99	99	99	99	1	1	2	2	2	2
15	2	1	2	3	3	2	1	1	1	5	1	1	1	2	1	1	1	2	1	1	1	2	1	1	1	2	2	2	2	2	2	99	3	99	99	99	99	99	99	99	99	99	99	1	1	1	2	2	2
34	2	1	2	1	3	1	2	4	1	5	1	1	1	2	1	1	1	1	4	99	99	2	1	2	1	2	2	2	2	1	2	99	3	99	99	99	99	99	99	99	99	99	99	1	1	2	1	2	1
15	2	1	2	5	4	2	1	1	1	5	1	1	1	2	1	1	1	2	1	1	1	2	1	1	1	2	2	2	2	2	2	99	3	99	99	99	99	99	99	99	99	99	99	1	1	1	2	2	2
15	2	1	2	1	3	2	1	1	1	5	1	1	1	2	1	1	1	2	4	99	99	2	1	1	1	2	2	2	2	2	2	99	3	99	99	99	99	99	99	99	99	99	99	1	1	1	2	2	2
34	2	1	2	4	1	1	2	4	1	5	1	1	1	2	1	1	1	1	1	1	1	2	1	2	1	2	2	2	2	1	2	99	3	99	99	99	99	99	99	99	99	99	99	1	1	2	1	2	1
34	2	1	2	2	3	1	2	4	1	5	2	1	1	2	1	1	1	1	1	1	1	2	1	2	1	2	2	2	2	1	2	99	3	99	99	99	99	99	99	99	99	99	99	1	1	2	1	2	1
36	2	1	2	1	3	1	2	6	1	5	2	2	1	2	1	1	1	1	4	99	99	2	1	2	2	2	2	2	2	2	2	1	1	99	99	99	99	99	99	99	99	99	99	1	1	2	2	1	2
34	2	1	2	4	3	2	2	4	1	5	2	1	1	2	1	1	1	1	4	99	99	2	1	2	1	2	2	2	2	1	2	99	3	99	99	99	99	99	99	99	99	99	99	1	1	2	1	2	1
15	2	1	2	1	3	1	1	1	1	5	2	1	1	2	1	1	1	2	1	1	1	2	1	1	1	2	2	2	2	2	2	99	3	99	99	99	99	99	99	99	99	99	99	1	1	1	2	2	2
15	2	1	2	1	3	1	1	1	1	5	2	1	1	2	1	1	1	2	4	99	99	2	1	1	1	2	2	2	2	2	2	99	3	99	99	99	99	99	99	99	99	99	99	1	1	1	2	2	2
15	2	1	2	4	2	1	1	1	1	5	2	1	1	2	1	1	1	2	1	1	1	2	1	1	1	2	2	2	2	2	2	99	3	99	99	99	99	99	99	99	99	99	99	1	1	1	2	2	2
34	2	1	2	1	3	1	2	4	1	5	2	1	1	2	2	1	1	1	4	99	99	2	1	2	1	2	2	2	2	1	2	99	3	99	99	99	99	99	99	99	99	99	99	1	1	2	1	2	1
15	2	1	2	1	3	2	1	1	1	5	2	1	1	2	1	1	1	2	4	99	99	2	1	1	1	2	2	2	2	2	2	99	3	99	99	99	99	99	99	99	99	99	99	1	1	1	2	2	2
31	1	0	2	1	2	3	1	1	1	4	2	1	1	2	2	1	1	1	2	1	1	2	1	2	2	2	2	2	2	2	2	99	5	1	2	2	1	1	2	1	2	2	1	1	1	2	1	2	2
34	1	0	2	1	2	1	2	4	1	5	2	1	1	2	1	1	1	1	4	99	99	2	1	2	1	2	2	2	2	1	2	99	3	99	99	99	99	99	99	99	99	99	99	1	1	2	1	2	1
15	1	0	2	3	3	1	1	1	1	5	2	1	1	2	1	1	1	2	4	99	99	2	1	1	1	2	2	2	2	2	2	99	3	99	99	99	99	99	99	99	99	99	99	1	1	1	2	2	2
34	1	0	2	1	2	3	2	4	1	5	2	1	1	2	2	1	1	1	4	99	99	2	1	2	1	2	2	2	2	1	2	99	3	99	99	99	99	99	99	99	99	99	99	1	1	2	1	2	1
34	1	0	2	1	3	3	2	4	1	5	2	1	1	2	1	1	1	1	1	1	1	2	1	2	1	2	2	2	2	1	2	99	3	99	99	99	99	99	99	99	99	99	99	1	1	2	1	2	1
15	1	0	1	3	3	1	1	1	1	5	2	1	1	2	1	1	1	2	4	99	99	2	1	1	1	2	2	2	2	2	2	99	3	99	99	99	99	99	99	99	99	99	99	1	1	1	2	2	2
15	1	0	2	1	3	1	1	1	1	5	2	1	1	2	2	1	1	2	1	1	1	2	1	1	1	2	2	2	2	2	2	99	3	99	99	99	99	99	99	99	99	99	99	1	1	1	2	2	2
15	1	0	2	1	3	3	1	1	1	5	2	1	1	2	1	1	1	2	4	99	99	2	1	1	1	2	2	2	2	2	2	99	3	99	99	99	99	99	99	99	99	99	99	1	1	1	2	2	2
34	1	0	2	1	2	1	2	4	1	5	2	1	1	2	2	1	1	1	4	99	99	2	1	2	1	2	2	2	2	1	2	99	3	99	99	99	99	99	99	99	99	99	99	1	1	2	1	2	1
34	1	0	2	1	3	3	2	4	1	5	2	1	1	2	1	1	1	1	1	1	1	2	1	2	1	2	2	2	2	1	2	99	3	99	99	99	99	99	99	99	99	99	99	1	1	2	1	2	1
40	2	1	1	1	3	1	2	5	1	3	2	1	1	1	1	1	1	1	4	99	99	2	1	2	1	2	2	2	2	2	2	99	1	99	99	99	99	99	99	99	99	99	99	1	1	2	2	1	2
27	2	1	2	1	3	2	1	1	1	3	2	1	1	1	2	1	1	1	4	99	99	2	1	2	2	2	2	2	2	2	2	99	3	99	99	99	99	99	99	99	99	99	99	2	1	1	2	1	1
40	2	1	2	3	3	1	2	5	1	3	2	1	1	1	2	1	1	1	1	1	1	2	1	2	1	2	2	2	2	2	2	99	1	99	99	99	99	99	99	99	99	99	99	1	1	2	2	1	2
45	2	1	2	2	3	2	1	7	1	3	2	1	2	1	1	1	1	1	1	1	1	2	1	2	2	2	2	1	2	2	2	99	1	99	99	99	99	99	99	99	99	99	99	1	1	2	2	2	1
27	2	1	2	1	3	2	1	1	1	3	2	1	1	2	2	1	1	1	4	99	99	2	1	2	2	2	2	2	2	2	2	99	3	99	99	99	99	99	99	99	99	99	99	2	1	1	2	1	1
40	2	1	2	3	1	2	2	5	1	3	2	1	1	2	2	1	1	1	4	99	99	2	1	2	1	2	2	2	2	2	2	99	1	99	99	99	99	99	99	99	99	99	99	1	1	2	2	1	2
31	2	1	2	1	3	2	1	1	1	4	1	1	1	1	1	1	1	1	2	1	1	2	1	2	2	2	2	2	2	2	2	99	5	1	2	2	1	1	2	1	2	2	1	1	1	2	1	2	2
31	2	1	2	1	3	2	1	1	1	4	2	1	1	2	1	1	1	1	2	1	1	2	1	2	2	2	2	2	2	2	2	99	5	1	2	2	1	1	2	1	2	2	1	1	1	2	1	2	2
34	2	1	2	3	2	1	2	4	1	5	1	1	1	1	1	1	1	1	4	99	1	2	1	2	1	2	2	2	2	1	2	99	3	99	99	99	99	99	99	99	99	99	99	1	1	2	1	2	1
14	2	1	2	5	2	2	1	1	1	5	1	1	1	1	1	1	1	1	1	1	2	2	1	2	2	2	2	1	2	1	2	99	1	99	99	99	99	99	99	99	99	99	99	1	1	2	1	1	1
34	2	1	2	2	3	2	2	4	1	5	1	1	1	1	1	1	1	1	1	1	1	2	1	2	1	2	2	2	2	1	2	99	3	99	99	99	99	99	99	99	99	99	99	1	1	2	1	2	1
15	2	1	2	3	3	3	1	1	1	5	2	1	1	2	1	1	1	2	1	1	1	2	1	1	1	2	2	2	2	2	2	99	3	99	99	99	99	99	99	99	99	99	99	1	1	1	2	2	2
36	2	1	2	1	3	1	2	6	1	5	2	2	1	1	1	1	1	1	1	1	1	2	1	2	2	2	2	2	2	2	2	1	1	99	99	99	99	99	99	99	99	99	99	1	1	2	2	1	2
15	2	1	2	2	2	1	1	1	1	5	2	1	1	1	2	1	1	2	4	99	99	2	1	1	1	2	2	2	2	2	2	99	3	99	99	99	99	99	99	99	99	99	99	1	1	1	2	2	2
34	2	1	2	1	3	2	2	4	1	5	2	1	1	1	1	1	1	1	1	1	1	2	1	2	1	2	2	2	2	1	2	99	3	99	99	99	99	99	99	99	99	99	99	1	1	2	1	2	1
15	2	1	2	1	2	1	1	1	1	5	2	1	1	1	1	1	1	2	4	99	99	2	1	1	1	2	2	2	2	2	2	99	3	99	99	99	99	99	99	99	99	99	99	1	1	1	2	2	2
34	2	1	2	1	3	1	2	4	1	5	2	1	1	1	1	1	1	1	1	1	1	2	1	2	1	2	2	2	2	1	2	99	3	99	99	99	99	99	99	99	99	99	99	1	1	2	1	2	1
36	2	1	2	1	3	2	2	6	1	6	1	2	1	2	1	1	1	1	1	1	1	2	1	2	2	2	2	2	2	2	2	1	1	99	99	99	99	99	99	99	99	99	99	1	1	2	2	1	2
36	2	1	1	1	3	2	2	6	1	6	1	2	1	1	1	2	1	1	1	1	1	2	1	2	2	2	2	2	2	2	2	1	1	99	99	99	99	99	99	99	99	99	99	1	1	2	2	1	2
36	2	1	2	1	3	1	2	6	1	6	2	2	1	2	2	1	1	2	1	1	99	99	1	2	2	2	2	2	2	2	2	1	1	99	99	99	99	99	99	99	99	99	99	1	1	2	2	1	2
14	2	1	2	1	3	1	1	1	1	2	1	1	1	2	1	1	1	1	1	1	2	2	1	2	2	2	2	1	2	1	2	99	1	99	99	99	99	99	99	99	99	99	99	1	1	2	1	1	1
23	2	1	2	3	3	2	2	2	1	2	1	1	1	2	1	2	1	1	1	1	1	2	1	2	1	1	2	2	2	2	2	99	3	99	99	99	99	99	99	99	99	99	99	2	1	2	1	2	2
34	2	1	2	3	3	1	2	3	1	2	1	1	1	2	1	1	1	1	2	1	1	2	1	2	1	2	2	2	1	2	2	99	5	99	99	99	99	99	99	99	99	99	99	1	1	2	2	2	2
33	2	1	2	1	3	1	2	3	1	2	1	1	1	2	1	1	1	1	1	1	1	2	1	2	1	2	2	2	2	2	2	99	1	99	99	99	99	99	99	99	99	99	99	2	1	2	2	2	2
33	2	1	2	3	3	1	2	3	1	2	1	1	1	2	1	2	1	1	1	1	1	2	1	2	1	2	2	2	2	2	2	99	1	99	99	99	99	99	99	99	99	99	99	1	1	2	2	2	2
14	2	1	2	4	1	2	1	1	1	2	1	1	1	2	1	1	1	1	1	1	2	2	1	2	2	2	2	1	2	1	2	99	1	99	99	99	99	99	99	99	99	99	99	1	1	2	1	1	1
34	2	1	1	5	4	2	2	3	1	2	1	1	1	2	1	1	1	1	2	1	1	2	1	2	1	2	2	2	1	2	2	99	5	99	99	99	99	99	99	99	99	99	99	1	1	2	2	2	2
33	2	1	2	1	3	1	2	3	1	2	1	1	1	2	1	1	1	1	1	1	1	2	1	2	1	2	2	2	2	2	2	99	1	99	99	99	99	99	99	99	99	99	99	2	1	2	2	2	2
14	2	1	2	4	1	1	1	1	1	2	1	1	1	2	1	1	1	1	1	1	2	2	1	2	2	2	2	1	2	1	2	99	1	99	99	99	99	99	99	99	99	99	99	1	1	2	1	1	1
23	2	1	2	1	2	1	2	2	1	2	1	1	1	2	1	2	1	1	1	1	1	2	1	2	1	1	2	2	2	2	2	99	3	99	99	99	99	99	99	99	99	99	99	2	1	2	1	2	2
34	2	1	2	1	2	1	2	3	1	2	1	1	1	2	1	1	1	1	2	1	1	2	1	2	1	2	2	2	1	2	2	99	5	99	99	99	99	99	99	99	99	99	99	1	1	2	2	2	2
33	2	1	2	1	3	2	2	3	1	2	1	1	1	2	1	1	1	1	1	1	1	2	1	2	1	2	2	2	2	2	2	99	1	99	99	99	99	99	99	99	99	99	99	2	1	2	2	2	2
33	2	1	2	1	3	2	2	3	1	2	1	1	1	2	1	2	1	1	1	1	1	2	1	2	1	2	2	2	2	2	2	99	1	99	99	99	99	99	99	99	99	99	99	1	1	2	2	2	2
23	2	1	2	3	2	1	2	2	1	2	1	1	1	2	1	2	1	1	1	1	1	2	1	2	1	1	2	2	2	2	2	99	3	99	99	99	99	99	99	99	99	99	99	2	1	2	1	2	2
33	2	1	2	1	3	1	2	3	1	2	1	1	1	2	1	1	1	1	1	1	1	2	1	2	1	2	2	2	2	2	2	99	1	99	99	99	99	99	99	99	99	99	99	2	1	2	2	2	2
14	2	1	2	1	3	1	1	1	1	2	1	1	1	2	1	1	1	1	1	1	2	2	1	2	2	2	2	1	2	1	2	99	1	99	99	99	99	99	99	99	99	99	99	1	1	2	1	1	1
23	2	1	2	1	3	1	2	2	1	2	1	1	1	2	1	2	1	1	1	1	1	2	1	2	1	1	2	2	2	2	2	99	3	99	99	99	99	99	99	99	99	99	99	2	1	2	1	2	2
33	2	1	2	1	2	2	2	3	1	2	1	1	1	2	1	1	1	1	1	1	1	2	1	2	1	2	2	2	2	2	2	99	1	99	99	99	99	99	99	99	99	99	99	2	1	2	2	2	2
34	2	1	2	1	2	1	2	3	1	2	1	1	1	2	1	1	1	1	2	1	1	2	1	2	1	2	2	2	1	2	2	99	5	99	99	99	99	99	99	99	99	99	99	1	1	2	2	2	2
33	2	1	2	1	3	2	2	3	1	2	1	1	1	2	1	1	1	1	1	1	1	2	1	2	1	2	2	2	2	2	2	99	1	99	99	99	99	99	99	99	99	99	99	2	1	2	2	2	2
33	2	1	2	5	3	2	2	3	1	2	1	1	1	2	1	2	1	1	1	1	1	2	1	2	1	2	2	2	2	2	2	99	1	99	99	99	99	99	99	99	99	99	99	1	1	2	2	2	2
23	2	1	2	1	3	2	2	2	1	2	1	1	1	2	1	2	1	1	1	1	1	2	1	2	1	1	2	2	2	2	2	99	3	99	99	99	99	99	99	99	99	99	99	2	1	2	1	2	2
34	2	1	2	1	1	3	2	3	1	2	1	1	1	2	1	1	1	1	2	1	1	2	1	2	1	2	2	2	1	2	2	99	5	99	99	99	99	99	99	99	99	99	99	1	1	2	2	2	2
33	2	1	2	2	2	1	2	3	1	2	1	1	1	2	1	1	1	1	1	1	1	2	1	2	1	2	2	2	2	2	2	99	1	99	99	99	99	99	99	99	99	99	99	2	1	2	2	2	2
33	2	1	2	1	3	1	2	3	1	2	1	1	1	2	1	2	1	1	1	1	1	2	1	2	1	2	2	2	2	2	2	99	1	99	99	99	99	99	99	99	99	99	99	1	1	2	2	2	2
23	2	1	2	3	3	3	2	2	1	2	1	1	1	2	1	2	1	1	1	1	1	2	1	2	1	1	2	2	2	2	2	99	3	99	99	99	99	99	99	99	99	99	99	2	1	2	1	2	2
34	2	1	2	1	3	1	2	3	1	2	1	1	1	2	1	1	1	1	2	1	1	2	1	2	1	2	2	2	1	2	2	99	5	99	99	99	99	99	99	99	99	99	99	1	1	2	2	2	2
33	2	1	2	4	2	1	2	3	1	2	1	1	1	2	1	2	1	1	1	1	1	2	1	2	1	2	2	2	2	2	2	99	1	99	99	99	99	99	99	99	99	99	99	1	1	2	2	2	2
34	2	1	2	3	3	2	2	3	1	2	1	1	1	2	1	1	1	1	2	1	1	2	1	2	1	2	2	2	1	2	2	99	5	99	99	99	99	99	99	99	99	99	99	1	1	2	2	2	2
33	2	1	2	1	3	1	2	3	1	2	2	1	1	2	1	2	1	1	1	1	1	2	1	2	1	2	2	2	2	2	2	99	1	99	99	99	99	99	99	99	99	99	99	1	1	2	2	2	2
34	2	1	2	1	3	1	2	3	1	2	2	1	1	2	1	1	1	1	2	1	1	2	1	2	1	2	2	2	1	2	2	99	5	99	99	99	99	99	99	99	99	99	99	1	1	2	2	2	2
33	2	1	2	1	2	1	2	3	1	2	2	1	1	2	1	2	1	1	1	1	1	2	1	2	1	2	2	2	2	2	2	99	1	99	99	99	99	99	99	99	99	99	99	1	1	2	2	2	2
34	2	1	2	1	3	2	2	3	1	2	2	1	1	2	1	1	1	1	2	1	1	2	1	2	1	2	2	2	1	2	2	99	5	99	99	99	99	99	99	99	99	99	99	1	1	2	2	2	2
33	2	1	2	1	3	2	2	3	1	2	2	1	1	2	1	1	1	1	1	1	1	2	1	2	1	2	2	2	2	2	2	99	1	99	99	99	99	99	99	99	99	99	99	2	1	2	2	2	2
33	2	1	1	1	3	2	2	3	1	2	2	1	1	2	2	2	1	1	1	1	1	2	1	2	1	2	2	2	2	2	2	99	1	99	99	99	99	99	99	99	99	99	99	1	1	2	2	2	2
33	2	1	2	1	3	1	2	3	1	2	2	1	1	2	1	1	1	1	1	1	1	2	1	2	1	2	2	2	2	2	2	99	1	99	99	99	99	99	99	99	99	99	99	2	1	2	2	2	2
14	2	1	2	1	3	1	1	1	1	2	3	1	1	2	2	1	1	1	1	1	2	2	1	2	2	2	2	1	2	1	2	99	1	99	99	99	99	99	99	99	99	99	99	1	1	2	1	1	1
23	2	1	2	1	2	2	2	2	1	2	3	1	1	2	1	2	1	1	1	1	1	2	1	2	1	1	2	2	2	2	2	99	3	99	99	99	99	99	99	99	99	99	99	2	1	2	1	2	2
23	2	1	2	1	3	1	2	2	1	2	3	1	1	2	1	2	1	1	1	1	1	2	1	2	1	1	2	2	2	2	2	99	3	99	99	99	99	99	99	99	99	99	99	2	1	2	1	2	2
45	2	1	2	1	3	1	1	7	1	3	1	1	2	2	1	1	1	1	1	1	1	2	1	2	2	2	2	1	2	2	2	99	1	99	99	99	99	99	99	99	99	99	99	1	1	2	2	2	1
17	2	1	2	1	3	2	1	1	1	3	1	1	1	2	2	2	1	1	1	1	1	2	1	2	2	2	2	2	2	2	2	99	3	99	99	99	99	99	99	99	99	99	99	1	1	1	1	1	2
27	2	1	2	3	3	1	1	1	1	3	1	1	1	2	1	2	1	1	1	1	1	2	1	2	2	2	2	2	2	2	2	99	3	99	99	99	99	99	99	99	99	99	99	2	1	1	2	1	1
20	2	1	3	1	3	2	2	2	1	3	1	1	1	2	2	1	1	1	1	1	1	2	1	2	1	2	2	2	2	2	2	99	1	99	99	99	99	99	99	99	99	99	99	1	1	2	2	2	2
45	2	1	2	5	4	2	1	7	1	3	1	1	2	2	1	1	1	1	1	1	1	2	1	2	2	2	2	1	2	2	2	99	1	99	99	99	99	99	99	99	99	99	99	1	1	2	2	2	1
17	2	1	2	1	3	1	1	1	1	3	1	1	1	2	1	2	1	1	1	1	1	2	1	2	2	2	2	2	2	2	2	99	3	99	99	99	99	99	99	99	99	99	99	1	1	1	1	1	2
27	2	1	2	3	3	2	1	1	1	3	1	1	1	2	1	2	1	1	1	1	1	2	1	2	2	2	2	2	2	2	2	99	3	99	99	99	99	99	99	99	99	99	99	2	1	1	2	1	1
40	2	1	2	1	3	1	2	5	1	3	1	1	1	2	1	2	1	1	1	1	1	2	1	2	1	2	2	2	2	2	2	99	1	99	99	99	99	99	99	99	99	99	99	1	1	2	2	1	2
20	2	1	2	1	3	1	2	2	1	3	1	1	1	2	2	1	1	1	1	1	1	2	1	2	1	2	2	2	2	2	2	99	1	99	99	99	99	99	99	99	99	99	99	1	1	2	2	2	2
45	2	1	2	1	3	1	1	7	1	3	1	1	2	2	1	1	1	1	1	1	1	2	1	2	2	2	2	1	2	2	2	99	1	99	99	99	99	99	99	99	99	99	99	1	1	2	2	2	1
17	2	1	2	1	3	2	1	1	1	3	1	1	1	2	1	2	1	1	1	1	1	2	1	2	2	2	2	2	2	2	2	99	3	99	99	99	99	99	99	99	99	99	99	1	1	1	1	1	2
27	2	1	2	1	3	1	1	1	1	3	1	1	1	2	2	2	1	1	1	1	1	2	1	2	2	2	2	2	2	2	2	99	3	99	99	99	99	99	99	99	99	99	99	2	1	1	2	1	1
40	2	1	2	3	3	2	2	5	1	3	1	1	1	2	2	2	1	1	1	1	1	2	1	2	1	2	2	2	2	2	2	99	1	99	99	99	99	99	99	99	99	99	99	1	1	2	2	1	2
20	2	1	2	1	3	2	2	2	1	3	1	1	1	2	1	1	1	1	1	1	1	2	1	2	1	2	2	2	2	2	2	99	1	99	99	99	99	99	99	99	99	99	99	1	1	2	2	2	2
45	2	1	2	1	3	1	1	7	1	3	1	1	2	2	2	1	1	1	1	1	1	2	1	2	2	2	2	1	2	2	2	99	1	99	99	99	99	99	99	99	99	99	99	1	1	2	2	2	1
17	2	1	2	1	1	2	1	1	1	3	1	1	1	2	1	2	1	1	1	1	1	2	1	2	2	2	2	2	2	2	2	99	3	99	99	99	99	99	99	99	99	99	99	1	1	1	1	1	2
40	2	1	2	1	3	2	2	5	1	3	1	1	1	2	1	2	1	1	1	1	1	2	1	2	1	2	2	2	2	2	2	99	1	99	99	99	99	99	99	99	99	99	99	1	1	2	2	1	2
20	2	1	2	1	3	2	2	2	1	3	1	1	1	2	1	1	1	1	1	1	1	2	1	2	1	2	2	2	2	2	2	99	1	99	99	99	99	99	99	99	99	99	99	1	1	2	2	2	2
27	2	1	2	1	3	2	1	1	1	3	1	1	1	2	2	2	1	1	1	1	1	2	1	2	2	2	2	2	2	2	2	99	3	99	99	99	99	99	99	99	99	99	99	2	1	1	2	1	1
40	2	1	2	1	3	1	2	5	1	3	1	1	1	2	2	2	1	1	1	1	1	2	1	2	1	2	2	2	2	2	2	99	1	99	99	99	99	99	99	99	99	99	99	1	1	2	2	1	2
20	2	1	2	4	2	1	2	2	1	3	1	1	1	2	1	1	1	1	1	1	1	2	1	2	1	2	2	2	2	2	2	99	1	99	99	99	99	99	99	99	99	99	99	1	1	2	2	2	2
45	2	1	2	1	3	2	1	7	1	3	1	1	2	2	2	1	1	1	1	1	1	2	1	2	2	2	2	1	2	2	2	99	1	99	99	99	99	99	99	99	99	99	99	1	1	2	2	2	1
45	2	1	2	3	1	2	1	7	1	3	1	1	2	2	2	1	1	1	1	1	1	2	1	2	2	2	2	1	2	2	2	99	1	99	99	99	99	99	99	99	99	99	99	1	1	2	2	2	1
17	2	1	2	1	3	1	1	1	1	3	2	1	1	2	2	1	1	1	4	99	99	2	1	2	2	2	2	2	2	2	2	99	3	99	99	99	99	99	99	99	99	99	99	1	1	1	1	1	2
27	2	1	2	1	3	1	1	1	1	3	2	1	1	2	2	1	1	1	4	99	99	2	1	2	2	2	2	2	2	2	2	99	3	99	99	99	99	99	99	99	99	99	99	2	1	1	2	1	1
20	2	1	2	4	2	1	2	2	1	3	2	1	1	2	1	1	1	1	1	1	1	2	1	2	1	2	2	2	2	2	2	99	1	99	99	99	99	99	99	99	99	99	99	1	1	2	2	2	2
17	2	1	2	1	3	1	1	1	1	3	2	1	1	2	2	1	1	1	1	1	1	2	1	2	2	2	2	2	2	2	2	99	3	99	99	99	99	99	99	99	99	99	99	1	1	1	1	1	2
20	2	1	2	1	3	1	2	2	1	3	2	1	1	2	2	1	1	1	4	99	99	2	1	2	1	2	2	2	2	2	2	99	1	99	99	99	99	99	99	99	99	99	99	1	1	2	2	2	2
17	2	1	2	1	1	1	1	1	1	3	2	1	1	2	2	1	1	1	4	99	99	2	1	2	2	2	2	2	2	2	2	99	3	99	99	99	99	99	99	99	99	99	99	1	1	1	1	1	2
27	2	1	2	3	3	1	1	1	1	3	2	1	1	2	1	1	1	1	1	1	1	2	1	2	2	2	2	2	2	2	2	99	3	99	99	99	99	99	99	99	99	99	99	2	1	1	2	1	1
34	2	1	2	4	1	2	2	3	1	3	2	1	1	2	2	1	1	1	4	99	99	2	1	2	1	2	2	2	1	2	2	99	5	99	99	99	99	99	99	99	99	99	99	1	1	2	2	2	2
45	2	1	2	1	3	1	1	7	1	3	2	1	2	2	2	1	1	1	4	99	99	2	1	2	2	2	2	1	2	2	2	99	1	99	99	99	99	99	99	99	99	99	99	1	1	2	2	2	1
17	2	1	2	5	4	2	1	1	1	3	2	1	1	2	1	1	1	1	1	1	1	2	1	2	2	2	2	2	2	2	2	99	3	99	99	99	99	99	99	99	99	99	99	1	1	1	1	1	2
17	2	1	2	1	3	1	1	1	1	3	2	1	1	2	1	1	1	1	4	99	99	2	1	2	2	2	2	2	2	2	2	99	3	99	99	99	99	99	99	99	99	99	99	1	1	1	1	1	2
27	2	1	2	2	3	1	1	1	1	3	2	1	1	2	2	1	1	1	1	1	1	2	1	2	2	2	2	2	2	2	2	99	3	99	99	99	99	99	99	99	99	99	99	2	1	1	2	1	1
40	2	1	2	5	4	2	2	5	1	3	2	1	1	2	2	1	1	1	1	1	1	2	1	2	1	2	2	2	2	2	2	99	1	99	99	99	99	99	99	99	99	99	99	1	1	2	2	1	2
20	2	1	2	1	3	2	2	2	1	3	2	1	1	2	2	1	1	1	4	99	99	22	1	2	1	2	2	2	2	2	2	99	1	99	99	99	99	99	99	99	99	99	99	1	1	2	2	2	2
45	2	1	2	4	1	1	1	7	1	3	2	1	1	2	1	1	1	1	4	99	99	2	1	2	2	2	2	1	2	2	2	99	1	99	99	99	99	99	99	99	99	99	99	1	1	2	2	2	1
17	2	1	2	1	3	2	1	1	1	3	2	1	1	2	2	1	1	1	4	99	99	2	1	2	2	2	2	2	2	2	2	99	3	99	99	99	99	99	99	99	99	99	99	1	1	1	1	1	2
40	2	1	2	1	2	1	2	5	1	3	2	1	1	2	2	1	1	1	1	1	1	2	1	2	1	2	2	2	2	2	2	99	1	99	99	99	99	99	99	99	99	99	99	1	1	2	2	1	2
20	2	1	2	1	3	1	2	2	1	3	2	1	1	2	1	1	1	1	4	99	99	2	1	2	1	2	2	2	2	2	2	99	1	99	99	99	99	99	99	99	99	99	99	1	1	2	2	2	2
17	2	1	2	3	3	1	1	1	1	3	2	1	1	2	2	1	1	1	4	99	99	1	1	2	2	2	2	2	2	2	2	99	3	99	99	99	99	99	99	99	99	99	99	1	1	1	1	1	2
27	2	1	2	1	2	1	1	1	1	3	2	1	1	2	1	1	1	1	1	1	1	1	1	2	2	2	2	2	2	2	2	99	3	99	99	99	99	99	99	99	99	99	99	2	1	1	2	1	1
20	2	1	2	1	3	1	2	2	1	3	2	1	1	2	1	1	1	1	4	99	99	2	1	2	1	2	2	2	2	2	2	99	1	99	99	99	99	99	99	99	99	99	99	1	1	2	2	2	2
14	2	1	2	1	3	1	1	1	1	3	2	1	1	2	1	1	1	1	4	99	99	2	1	2	2	2	2	1	2	1	2	99	1	99	99	99	99	99	99	99	99	99	99	1	1	2	1	1	1
45	2	1	2	1	3	1	1	7	1	3	2	1	2	2	1	1	1	1	3	1	1	2	1	2	2	2	2	1	2	2	2	99	1	99	99	99	99	99	99	99	99	99	99	1	1	2	2	2	1
23	2	1	2	1	3	1	2	2	1	4	1	1	1	2	1	1	1	1	4	1	1	2	1	2	1	1	2	2	2	2	2	99	3	99	99	99	99	99	99	99	99	99	99	2	1	2	1	2	2
31	2	1	2	1	3	1	1	1	1	4	1	1	1	2	1	1	1	1	2	1	1	2	1	2	2	2	2	2	2	2	2	99	5	1	2	2	1	1	2	1	2	2	1	1	1	2	1	2	2
40	2	1	2	1	2	2	2	5	1	4	1	1	1	2	1	1	1	1	1	1	1	2	1	2	1	2	2	2	2	2	2	99	1	99	99	99	99	99	99	99	99	99	99	1	1	2	2	1	2
23	2	1	2	1	3	1	2	2	1	4	1	1	1	2	2	1	1	1	1	1	1	2	1	2	1	1	2	2	2	2	2	99	3	99	99	99	99	99	99	99	99	99	99	2	1	2	1	2	2
33	2	1	2	5	4	1	2	3	1	4	1	1	1	2	2	1	1	1	1	1	1	2	1	2	1	2	2	2	2	2	2	99	1	99	99	99	99	99	99	99	99	99	99	1	1	2	2	2	2
31	2	1	2	3	3	1	1	1	1	4	1	1	1	2	1	1	1	1	2	1	1	2	1	2	2	2	2	2	2	2	2	99	5	1	2	2	1	1	2	1	2	2	1	1	1	2	1	2	2
31	2	1	2	1	3	2	1	1	1	4	2	1	1	2	1	1	1	1	4	99	1	2	1	2	2	2	2	2	2	2	2	99	5	1	2	2	1	1	2	1	2	2	1	1	1	2	1	2	2
34	2	1	2	5	4	2	2	4	1	5	1	1	1	2	2	1	1	1	4	99	99	2	1	2	1	2	2	2	2	1	1	99	3	99	99	99	99	99	99	99	99	99	99	1	1	2	1	2	1
36	2	1	2	1	3	2	2	6	1	5	1	2	1	2	1	1	1	1	4	99	99	2	1	2	2	2	2	2	2	2	1	1	1	99	99	99	99	99	99	99	99	99	99	1	1	2	2	1	2
15	2	1	2	5	3	1	1	1	1	5	1	1	1	2	1	1	1	2	4	99	99	2	1	1	1	2	2	2	2	2	1	99	3	99	99	99	99	99	99	99	99	99	99	1	1	1	2	2	2
36	2	1	2	3	3	1	2	6	1	6	1	2	1	2	1	1	1	1	1	1	1	1	1	2	2	2	2	2	2	2	1	1	1	99	99	99	99	99	99	99	99	99	99	1	1	2	2	1	2
36	2	1	2	1	2	2	2	6	1	6	1	2	1	2	1	1	1	1	1	1	1	1	1	2	2	2	2	2	2	2	1	1	1	99	99	99	99	99	99	99	99	99	99	1	1	2	2	1	2
35	2	1	2	1	3	1	2	6	1	6	2	2	1	2	1	1	1	1	4	99	99	99	1	2	2	2	2	2	2	2	1	1	1	99	99	99	99	99	99	99	99	99	99	1	1	2	2	1	2
38	2	1	2	1	1	1	2	6	1	6	2	2	1	2	1	1	1	1	4	99	99	99	1	2	2	2	2	2	2	2	1	1	1	99	99	99	99	99	99	99	99	99	99	1	1	2	2	1	2
31	1	0	2	1	3	3	1	1	1	4	2	1	1	2	1	1	1	1	2	1	1	1	1	2	2	2	2	2	2	2	1	99	5	1	2	2	1	1	2	1	2	2	1	1	1	2	1	2	2
31	1	0	2	1	3	1	1	1	1	4	2	1	1	2	2	1	1	1	2	1	1	1	1	2	2	2	2	2	2	2	1	99	5	1	2	2	1	1	2	1	2	2	1	1	1	2	1	2	2
31	1	0	2	1	3	3	1	1	1	4	2	1	1	2	1	1	1	1	2	1	1	1	1	2	2	2	2	2	2	2	1	99	5	1	2	2	1	1	2	1	2	2	1	1	1	2	1	2	2
34	1	0	2	1	2	1	2	4	1	5	2	1	1	2	1	1	1	1	4	99	99	1	1	2	1	2	2	2	2	1	1	99	3	99	99	99	99	99	99	99	99	99	99	1	1	2	1	2	1
15	1	0	2	1	3	3	1	1	1	5	2	1	1	2	1	1	1	2	4	99	99	1	1	1	1	2	2	2	2	2	1	99	3	99	99	99	99	99	99	99	99	99	99	1	1	1	2	2	2
15	1	0	2	1	3	2	1	1	1	5	2	1	1	2	1	1	1	2	4	99	99	1	1	1	1	2	2	2	2	2	1	99	3	99	99	99	99	99	99	99	99	99	99	1	1	1	2	2	2
34	1	0	2	3	3	1	2	4	1	5	2	1	1	2	1	1	1	1	1	1	1	1	1	2	1	2	2	2	2	1	1	99	3	99	99	99	99	99	99	99	99	99	99	1	1	2	1	2	1
15	1	0	1	1	3	3	1	1	1	5	2	1	1	2	1	1	1	2	4	99	99	1	1	1	1	2	2	2	2	2	1	99	3	99	99	99	99	99	99	99	99	99	99	1	1	1	2	2	2
34	1	0	2	5	4	3	2	4	1	5	2	1	1	2	1	1	1	1	4	99	99	1	1	2	1	2	2	2	2	1	1	99	3	99	99	99	99	99	99	99	99	99	99	1	1	2	1	2	1
15	1	0	2	2	3	1	1	1	1	5	2	1	1	2	1	1	1	2	1	1	1	1	1	1	1	2	2	2	2	2	1	99	3	99	99	99	99	99	99	99	99	99	99	1	1	1	2	2	2
34	1	0	2	1	3	1	2	4	1	5	2	1	1	2	1	1	1	1	4	99	99	1	1	2	1	2	2	2	2	1	1	99	3	99	99	99	99	99	99	99	99	99	99	1	1	2	1	2	1
15	1	0	2	4	3	2	1	1	1	5	2	1	1	2	1	1	1	2	4	99	99	1	1	1	1	2	2	2	2	2	1	99	3	99	99	99	99	99	99	99	99	99	99	1	1	1	2	2	2
15	1	0	1	1	3	1	1	1	1	5	2	1	1	2	1	1	1	2	4	99	99	1	1	1	1	2	2	2	2	2	1	99	3	99	99	99	99	99	99	99	99	99	99	1	1	1	2	2	2
36	1	0	2	1	3	2	2	6	1	6	2	2	1	2	1	1	1	2	4	99	99	99	1	2	2	2	2	2	2	2	1	1	1	99	99	99	99	99	99	99	99	99	99	1	1	2	2	1	2
34	1	0	2	1	3	2	2	6	1	6	2	2	1	2	1	1	1	1	1	1	1	1	1	2	2	2	2	2	2	2	1	1	1	99	99	99	99	99	99	99	99	99	99	1	1	2	2	1	2
36	1	0	2	1	3	3	2	6	1	6	2	2	1	2	1	1	1	1	4	99	99	99	1	2	2	2	2	2	2	2	1	1	1	99	99	99	99	99	99	99	99	99	99	1	1	2	2	1	2
36	1	0	2	1	2	2	2	6	1	6	2	2	1	2	1	1	1	1	1	1	1	1	1	2	2	2	2	2	2	2	1	1	1	99	99	99	99	99	99	99	99	99	99	1	1	2	2	1	2
36	1	0	2	1	3	3	2	6	1	6	2	2	1	2	2	1	1	1	4	99	99	99	1	2	2	2	2	2	2	2	1	1	1	99	99	99	99	99	99	99	99	99	99	1	1	2	2	1	2
38	1	0	2	1	3	1	2	6	1	6	2	2	1	2	1	1	1	1	1	1	1	1	1	2	2	2	2	2	2	2	1	1	1	99	99	99	99	99	99	99	99	99	99	1	1	2	2	1	2
36	1	0	2	3	3	1	2	6	1	6	2	2	1	2	1	1	1	2	4	99	99	99	1	2	2	2	2	2	2	2	1	1	1	99	99	99	99	99	99	99	99	99	99	1	1	2	2	1	2
14	1	0	2	1	3	1	1	1	1	2	2	1	1	2	1	1	1	1	1	1	2	1	1	2	2	2	2	1	2	1	1	99	1	99	99	99	99	99	99	99	99	99	99	1	1	2	1	1	1
14	1	0	2	1	3	2	1	1	1	2	1	1	1	2	1	1	1	1	1	1	2	1	1	2	2	2	2	1	2	1	1	99	1	99	99	99	99	99	99	99	99	99	99	1	1	2	1	1	1
14	1	0	2	1	3	1	1	1	1	2	2	1	1	2	1	1	1	1	1	1	2	1	1	2	2	2	2	1	2	1	1	99	1	99	99	99	99	99	99	99	99	99	99	1	1	2	1	1	1
14	1	0	2	1	3	2	1	1	1	2	1	1	1	2	1	1	1	1	1	1	2	1	1	2	2	2	2	1	2	1	1	99	1	99	99	99	99	99	99	99	99	99	99	1	1	2	1	1	1
14	1	0	2	1	3	2	1	1	1	2	1	1	1	2	1	1	1	1	1	1	2	1	1	2	2	2	2	1	2	1	1	99	1	99	99	99	99	99	99	99	99	99	99	1	1	2	1	1	1
14	1	0	2	1	3	1	1	1	1	2	2	1	1	2	1	1	1	1	1	1	2	1	1	2	2	2	2	1	2	1	1	99	1	99	99	99	99	99	99	99	99	99	99	1	1	2	1	1	1
14	1	0	2	1	3	1	1	1	1	2	2	1	1	2	1	1	1	1	1	1	2	1	1	2	2	2	2	1	2	1	1	99	1	99	99	99	99	99	99	99	99	99	99	1	1	2	1	1	1
14	1	0	3	1	3	2	1	1	1	2	2	1	1	2	1	1	1	1	1	1	2	1	1	2	2	2	2	1	2	1	1	99	1	99	99	99	99	99	99	99	99	99	99	1	1	2	1	1	1
14	1	0	2	1	1	1	1	1	1	2	2	1	1	2	1	1	1	1	1	1	2	1	1	2	2	2	2	1	2	1	1	99	1	99	99	99	99	99	99	99	99	99	99	1	1	2	1	1	1
34	1	0	2	1	3	1	2	3	1	2	2	1	1	2	1	1	1	1	2	1	1	1	1	2	1	2	2	2	1	2	1	99	5	99	99	99	99	99	99	99	99	99	99	1	1	2	2	2	2
33	1	0	2	1	3	1	2	3	1	2	2	1	1	2	1	1	1	1	1	1	1	1	1	2	1	2	2	2	2	2	1	99	1	99	99	99	99	99	99	99	99	99	99	2	1	2	2	2	2
33	1	0	2	1	3	1	2	3	1	2	2	1	1	2	1	2	1	1	1	1	1	1	1	2	1	2	2	2	2	2	1	99	1	99	99	99	99	99	99	99	99	99	99	1	1	2	2	2	2
34	1	0	2	1	3	1	2	3	1	2	2	1	1	2	1	1	1	1	2	1	1	1	1	2	1	2	2	2	1	2	1	99	5	99	99	99	99	99	99	99	99	99	99	1	1	2	2	2	2
33	1	0	2	1	3	1	2	3	1	2	2	1	1	2	1	1	1	1	1	1	1	1	1	2	1	2	2	2	2	2	1	99	1	99	99	99	99	99	99	99	99	99	99	2	1	2	2	2	2
33	1	0	2	1	3	2	2	3	1	2	2	1	1	2	1	2	1	1	1	1	1	1	1	2	1	2	2	2	2	2	1	99	1	99	99	99	99	99	99	99	99	99	99	1	1	2	2	2	2
34	1	0	2	4	4	1	2	3	1	2	2	1	1	2	1	1	1	1	2	1	1	1	1	2	1	2	2	2	1	2	1	99	5	99	99	99	99	99	99	99	99	99	99	1	1	2	2	2	2
33	1	0	2	1	3	1	2	3	1	2	2	1	1	2	1	1	1	1	1	1	1	1	1	2	1	2	2	2	2	2	1	99	1	99	99	99	99	99	99	99	99	99	99	2	1	2	2	2	2
33	1	0	2	1	3	1	2	3	1	2	2	1	1	2	1	2	1	1	1	1	1	1	1	2	1	2	2	2	2	2	1	99	1	99	99	99	99	99	99	99	99	99	99	1	1	2	2	2	2
34	1	0	2	1	3	1	2	3	1	2	2	1	1	2	1	1	1	1	2	1	1	1	1	2	1	2	2	2	1	2	1	99	5	99	99	99	99	99	99	99	99	99	99	1	1	2	2	2	2
33	1	0	2	1	3	1	2	3	1	2	2	1	1	2	1	1	1	1	1	1	1	1	1	2	1	2	2	2	2	2	1	99	1	99	99	99	99	99	99	99	99	99	99	2	1	2	2	2	2
33	1	0	2	1	3	2	2	3	1	2	2	1	1	2	1	2	1	1	1	1	1	1	1	2	1	2	2	2	2	2	1	99	1	99	99	99	99	99	99	99	99	99	99	1	1	2	2	2	2
34	1	0	2	1	3	3	2	3	1	2	2	1	1	2	1	1	1	1	2	1	1	1	1	2	1	2	2	2	1	2	1	99	5	99	99	99	99	99	99	99	99	99	99	1	1	2	2	2	2
33	1	0	2	1	3	1	2	3	1	2	2	1	1	2	1	1	1	1	1	1	1	1	1	2	1	2	2	2	2	2	1	99	1	99	99	99	99	99	99	99	99	99	99	2	1	2	2	2	2
33	1	0	2	1	3	1	2	3	1	2	2	1	1	2	1	2	1	1	1	1	1	1	1	2	1	2	2	2	2	2	1	99	1	99	99	99	99	99	99	99	99	99	99	1	1	2	2	2	2
34	1	0	2	1	3	1	2	3	1	2	2	1	1	2	1	1	1	1	2	1	1	1	1	2	1	2	2	2	1	2	1	99	5	99	99	99	99	99	99	99	99	99	99	1	1	2	2	2	2
33	1	0	2	1	3	2	2	3	1	2	2	1	1	2	1	1	1	1	1	1	1	1	1	2	1	2	2	2	2	2	1	99	1	99	99	99	99	99	99	99	99	99	99	2	1	2	2	2	2
33	1	0	2	1	3	2	2	3	1	2	2	1	1	2	1	2	1	1	1	1	1	1	1	2	1	2	2	2	2	2	1	99	1	99	99	99	99	99	99	99	99	99	99	1	1	2	2	2	2
34	1	0	2	1	3	3	2	3	1	2	2	1	1	2	1	1	1	1	2	1	1	1	1	2	1	2	2	2	1	2	1	99	5	99	99	99	99	99	99	99	99	99	99	1	1	2	2	2	2
33	1	0	2	1	3	2	2	3	1	2	2	1	1	2	2	1	1	1	1	1	1	1	1	2	1	2	2	2	2	2	1	99	1	99	99	99	99	99	99	99	99	99	99	2	1	2	2	2	2
33	1	0	2	1	3	1	2	3	1	2	2	1	1	2	1	2	1	1	1	1	1	1	1	2	1	2	2	2	2	2	1	99	1	99	99	99	99	99	99	99	99	99	99	1	1	2	2	2	2
34	1	0	2	1	3	1	2	3	1	2	2	1	1	2	1	1	1	1	2	1	1	1	1	2	1	2	2	2	1	2	1	99	5	99	99	99	99	99	99	99	99	99	99	1	1	2	2	2	2
33	1	0	2	4	3	1	2	3	1	2	2	1	1	2	2	1	1	1	1	1	1	1	1	2	1	2	2	2	2	2	1	99	1	99	99	99	99	99	99	99	99	99	99	2	1	2	2	2	2
33	1	0	1	1	3	1	2	3	1	2	2	1	1	2	1	2	1	1	1	1	1	1	1	2	1	2	2	2	2	2	1	99	1	99	99	99	99	99	99	99	99	99	99	1	1	2	2	2	2
34	1	0	2	3	3	1	2	3	1	2	2	1	1	2	1	1	1	1	2	1	1	1	1	2	1	2	2	2	1	2	1	99	5	99	99	99	99	99	99	99	99	99	99	1	1	2	2	2	2
33	1	0	2	1	2	1	2	3	1	2	2	1	1	2	1	1	1	1	1	1	1	1	1	2	1	2	2	2	2	2	1	99	1	99	99	99	99	99	99	99	99	99	99	2	1	2	2	2	2
33	1	0	2	1	3	1	2	3	1	2	2	1	1	2	2	2	1	1	1	1	1	1	1	2	1	2	2	2	2	2	1	99	1	99	99	99	99	99	99	99	99	99	99	1	1	2	2	2	2
23	1	0	2	1	3	1	2	2	1	2	3	1	1	2	1	2	1	1	1	1	1	1	1	2	1	1	2	2	2	2	1	99	3	99	99	99	99	99	99	99	99	99	99	2	1	2	1	2	2
23	1	0	2	1	2	1	2	2	1	2	3	1	1	2	1	2	1	1	1	1	1	1	1	2	1	1	2	2	2	2	1	99	3	99	99	99	99	99	99	99	99	99	99	2	1	2	1	2	2
23	1	0	1	1	3	2	2	2	1	2	3	1	1	2	1	2	1	1	1	1	1	1	1	2	1	1	2	2	2	2	1	99	3	99	99	99	99	99	99	99	99	99	99	2	1	2	1	2	2
23	1	0	2	1	3	3	2	2	1	2	3	1	1	2	1	2	1	1	1	1	1	1	1	2	1	1	2	2	2	2	1	99	3	99	99	99	99	99	99	99	99	99	99	2	1	2	1	2	2
23	1	0	2	1	3	2	2	2	1	2	3	1	1	2	1	2	1	1	1	1	1	1	1	2	1	1	2	2	2	2	1	99	3	99	99	99	99	99	99	99	99	99	99	2	1	2	1	2	2
23	1	0	2	1	3	1	2	2	1	2	3	1	1	2	1	2	1	1	1	1	1	1	1	2	1	1	2	2	2	2	1	99	3	99	99	99	99	99	99	99	99	99	99	2	1	2	1	2	2
23	1	0	2	1	3	1	2	2	1	2	3	1	1	2	1	2	1	1	1	1	1	1	1	2	1	1	2	2	2	2	1	99	3	99	99	99	99	99	99	99	99	99	99	2	1	2	1	2	2
23	1	0	2	1	3	3	2	2	1	2	3	1	1	2	1	2	1	1	1	1	1	1	1	2	1	1	2	2	2	2	1	99	3	99	99	99	99	99	99	99	99	99	99	2	1	2	1	2	2
23	1	0	2	1	2	2	2	2	1	2	3	1	1	2	1	2	1	1	1	1	1	1	1	2	1	1	2	2	2	2	1	99	3	99	99	99	99	99	99	99	99	99	99	2	1	2	1	2	2
23	1	0	2	1	3	1	2	2	1	2	3	1	1	2	1	2	1	1	1	1	1	1	1	2	1	1	2	2	2	2	1	99	3	99	99	99	99	99	99	99	99	99	99	2	1	2	1	2	2
20	1	0	2	1	3	3	2	2	1	3	1	1	1	2	1	1	1	1	1	1	1	1	1	2	2	2	2	1	2	2	1	99	3	1	2	2	1	2	2	1	2	2	1	1	1	2	1	2	1
20	1	0	2	1	3	1	2	2	1	3	1	1	1	2	1	1	1	1	1	1	1	1	1	2	2	2	2	1	2	2	1	99	3	1	2	2	1	2	2	1	2	2	1	1	1	2	1	2	1
20	1	0	2	1	3	1	2	2	1	3	1	1	1	2	1	1	1	1	1	1	1	1	1	2	2	2	2	1	2	2	1	99	3	1	2	2	1	2	2	1	2	2	1	1	1	2	1	2	1
20	1	0	2	1	3	2	2	2	1	3	1	1	1	2	1	1	1	1	1	1	1	1	1	2	2	2	2	1	2	2	1	99	3	1	2	2	1	2	2	1	2	2	1	1	1	2	1	2	1
20	1	0	1	1	3	1	2	2	1	3	1	1	1	2	1	1	1	1	1	1	1	1	1	2	2	2	2	1	2	2	1	99	3	1	2	2	1	2	2	1	2	2	1	1	1	2	1	2	1
45	1	0	2	1	3	1	1	7	1	3	2	1	2	2	1	1	1	1	1	1	1	1	1	2	2	2	2	1	2	2	1	99	1	99	99	99	99	99	99	99	99	99	99	1	1	2	2	2	1
23	1	0	2	2	3	3	1	3	1	3	2	1	1	2	2	1	1	1	2	1	1	1	1	2	1	1	2	2	2	1	1	99	5	99	99	99	99	99	99	99	99	99	99	2	1	2	2	1	2
17	1	0	3	1	3	1	1	1	1	3	2	1	1	2	1	2	1	1	1	1	1	1	1	2	2	2	2	2	2	2	1	99	3	99	99	99	99	99	99	99	99	99	99	1	1	1	1	1	2
27	1	0	2	1	3	1	1	1	1	3	2	1	1	2	1	2	1	1	1	1	1	1	1	2	2	2	2	2	2	2	1	99	3	99	99	99	99	99	99	99	99	99	99	2	1	1	2	1	1
40	1	0	2	1	3	1	2	5	1	3	2	1	1	2	2	2	1	1	1	1	1	1	1	2	1	2	2	2	2	2	1	99	1	99	99	99	99	99	99	99	99	99	99	1	1	2	2	1	2
20	1	0	2	1	3	1	2	2	1	3	2	1	1	2	1	1	1	1	1	1	1	1	1	2	1	2	2	2	2	2	1	99	1	99	99	99	99	99	99	99	99	99	99	1	1	2	2	2	2
45	1	0	2	1	3	2	1	7	1	3	2	1	2	2	2	1	1	1	1	1	1	1	1	2	2	2	2	1	2	2	1	99	1	99	99	99	99	99	99	99	99	99	99	1	1	2	2	2	1
23	1	0	2	1	3	1	1	3	1	3	2	1	1	2	2	1	1	1	2	1	1	1	1	2	1	1	2	2	2	1	1	99	5	99	99	99	99	99	99	99	99	99	99	2	1	2	2	1	2
17	1	0	2	1	3	1	1	1	1	3	2	1	1	2	2	2	1	1	1	1	1	1	1	2	2	2	2	2	2	2	1	99	3	99	99	99	99	99	99	99	99	99	99	1	1	1	1	1	2
27	1	0	2	1	3	1	1	1	1	3	2	1	1	2	1	2	1	1	1	1	1	1	1	2	2	2	2	2	2	2	1	99	3	99	99	99	99	99	99	99	99	99	99	2	1	1	2	1	1
40	1	0	2	1	3	2	2	5	1	3	2	1	1	2	1	2	1	1	1	1	1	1	1	2	1	2	2	2	2	2	1	99	1	99	99	99	99	99	99	99	99	99	99	1	1	2	2	1	2
45	1	0	2	1	3	3	1	7	1	3	2	1	2	2	1	1	1	1	1	1	1	1	1	2	2	2	2	1	2	2	1	99	1	99	99	99	99	99	99	99	99	99	99	1	1	2	2	2	1
23	1	0	2	1	2	1	1	3	1	3	2	1	1	2	2	1	1	1	2	1	1	1	1	2	1	1	2	2	2	1	1	99	5	99	99	99	99	99	99	99	99	99	99	2	1	2	2	1	2
17	1	0	2	1	3	2	1	1	1	3	2	1	1	2	1	2	1	1	1	1	1	1	1	2	2	2	2	2	2	2	1	99	3	99	99	99	99	99	99	99	99	99	99	1	1	1	1	1	2
27	1	0	2	1	3	2	1	1	1	3	2	1	1	2	1	2	1	1	1	1	1	1	1	2	2	2	2	2	2	2	1	99	3	99	99	99	99	99	99	99	99	99	99	2	1	1	2	1	1
45	1	0	2	1	3	1	1	7	1	3	2	1	2	2	1	1	1	1	1	1	1	1	1	2	2	2	2	1	2	2	1	99	1	99	99	99	99	99	99	99	99	99	99	1	1	2	2	2	1
23	1	0	2	1	3	2	1	3	1	3	2	1	1	2	2	1	1	1	2	1	1	1	1	2	1	1	2	2	2	1	1	99	5	99	99	99	99	99	99	99	99	99	99	2	1	2	2	1	2
17	1	0	2	1	3	3	1	1	1	3	2	1	1	2	1	2	1	1	1	1	1	1	1	2	2	2	2	2	2	2	1	99	3	99	99	99	99	99	99	99	99	99	99	1	1	1	1	1	2
27	1	0	2	2	3	1	1	1	1	3	2	1	1	2	1	2	1	1	1	1	1	1	1	2	2	2	2	2	2	2	1	99	3	99	99	99	99	99	99	99	99	99	99	2	1	1	2	1	1
40	1	0	2	1	3	2	2	5	1	3	2	1	1	2	2	2	1	1	1	1	1	1	1	2	1	2	2	2	2	2	1	99	1	99	99	99	99	99	99	99	99	99	99	1	1	2	2	1	2
45	1	0	2	1	3	3	1	7	1	3	2	1	2	2	2	1	1	1	1	1	1	1	1	2	2	2	2	1	2	2	1	99	1	99	99	99	99	99	99	99	99	99	99	1	1	2	2	2	1
23	1	0	2	1	3	1	1	3	1	3	2	1	1	2	2	1	1	1	2	1	1	1	1	2	1	1	2	2	2	1	1	99	5	99	99	99	99	99	99	99	99	99	99	2	1	2	2	1	2
17	1	0	2	1	3	1	1	1	1	3	2	1	1	2	1	2	1	1	1	1	1	1	1	2	2	2	2	2	2	2	1	99	3	99	99	99	99	99	99	99	99	99	99	1	1	1	1	1	2
27	1	0	2	1	3	3	1	1	1	3	2	1	1	2	1	2	1	1	1	1	1	1	1	2	2	2	2	2	2	2	1	99	3	99	99	99	99	99	99	99	99	99	99	2	1	1	2	1	1
17	1	0	2	1	3	1	1	1	1	3	2	1	1	2	2	2	1	1	1	1	1	1	1	2	2	2	2	2	2	2	1	99	3	99	99	99	99	99	99	99	99	99	99	1	1	1	1	1	2
27	1	0	2	1	3	1	1	1	1	3	2	1	1	2	2	2	1	1	1	1	1	1	1	2	2	2	2	2	2	2	1	99	3	99	99	99	99	99	99	99	99	99	99	2	1	1	2	1	1
40	1	0	2	1	3	2	2	5	1	3	2	1	1	2	1	2	1	1	1	1	1	1	1	2	1	2	2	2	2	2	1	99	1	99	99	99	99	99	99	99	99	99	99	1	1	2	2	1	2
20	1	0	2	1	3	2	2	2	1	3	2	1	1	2	1	1	1	1	1	1	1	1	1	2	1	2	2	2	2	2	1	99	1	99	99	99	99	99	99	99	99	99	99	1	1	2	2	2	2
45	1	0	2	1	3	2	1	7	1	3	2	1	2	2	2	1	1	1	1	1	1	1	1	2	2	2	2	1	2	2	1	99	1	99	99	99	99	99	99	99	99	99	99	1	1	2	2	2	1
17	1	0	2	1	3	1	1	1	1	3	2	1	1	2	2	2	1	1	1	1	1	1	1	2	2	2	2	2	2	2	1	99	3	99	99	99	99	99	99	99	99	99	99	1	1	1	1	1	2
27	1	0	2	1	3	2	1	1	1	3	2	1	1	2	2	2	1	1	1	1	1	1	1	2	2	2	2	2	2	2	1	99	3	99	99	99	99	99	99	99	99	99	99	2	1	1	2	1	1
40	1	0	2	1	3	1	2	5	1	3	2	1	1	2	1	2	1	1	1	1	1	1	1	2	1	2	2	2	2	2	1	99	1	99	99	99	99	99	99	99	99	99	99	1	1	2	2	1	2
20	1	0	2	1	3	1	2	2	1	3	2	1	1	2	1	1	1	1	1	1	1	1	1	2	1	2	2	2	2	2	1	99	1	99	99	99	99	99	99	99	99	99	99	1	1	2	2	2	2
45	1	0	2	3	2	1	1	7	1	3	2	1	2	2	1	1	1	1	1	1	1	1	1	2	2	2	2	1	2	2	1	99	1	99	99	99	99	99	99	99	99	99	99	1	1	2	2	2	1
17	1	0	2	1	3	3	1	1	1	3	2	1	1	2	2	2	1	1	1	1	1	1	1	2	2	2	2	2	2	2	1	99	3	99	99	99	99	99	99	99	99	99	99	1	1	1	1	1	2
27	1	0	2	1	3	1	1	1	1	3	2	1	1	2	1	2	1	1	1	1	1	1	1	2	2	2	2	2	2	2	1	99	3	99	99	99	99	99	99	99	99	99	99	2	1	1	2	1	1
40	1	0	2	1	3	1	2	5	1	3	2	1	1	2	1	2	1	1	1	1	1	1	1	2	1	2	2	2	2	2	1	99	1	99	99	99	99	99	99	99	99	99	99	1	1	2	2	1	2
20	1	0	2	2	3	1	2	2	1	3	2	1	1	2	2	1	1	1	1	1	1	1	1	2	1	2	2	2	2	2	1	99	1	99	99	99	99	99	99	99	99	99	99	1	1	2	2	2	2
45	1	0	2	1	3	2	1	7	1	3	2	1	2	2	1	1	1	1	1	1	1	1	1	2	2	2	2	1	2	2	1	99	1	99	99	99	99	99	99	99	99	99	99	1	1	2	2	2	1
17	1	0	2	1	3	3	1	1	1	3	2	1	1	2	2	2	1	1	1	1	1	1	1	2	2	2	2	2	2	2	1	99	3	99	99	99	99	99	99	99	99	99	99	1	1	1	1	1	2
27	1	0	2	2	3	1	1	1	1	3	2	1	1	2	1	2	1	1	1	1	1	1	1	2	2	2	2	2	2	2	1	99	3	99	99	99	99	99	99	99	99	99	99	2	1	1	2	1	1
40	1	0	2	2	3	2	2	5	1	3	2	1	1	2	2	2	1	1	1	1	1	1	1	2	1	2	2	2	2	2	1	99	1	99	99	99	99	99	99	99	99	99	99	1	1	2	2	1	2
20	1	0	2	1	3	2	2	2	1	3	2	1	1	2	1	1	1	1	1	1	1	1	1	2	1	2	2	2	2	2	1	99	1	99	99	99	99	99	99	99	99	99	99	1	1	2	2	2	2
45	1	0	2	1	3	3	1	7	1	3	2	1	1	2	2	1	1	1	1	1	1	1	1	2	2	2	2	1	2	2	1	99	1	99	99	99	99	99	99	99	99	99	99	1	1	2	2	2	1
17	1	0	2	2	3	1	1	1	1	3	2	1	1	2	1	1	1	1	1	1	1	1	1	2	2	2	2	2	2	2	1	99	3	99	99	99	99	99	99	99	99	99	99	1	1	1	1	1	2
27	1	0	1	1	3	1	1	1	1	3	2	1	1	2	1	1	1	1	1	1	1	1	1	2	2	2	2	2	2	2	1	99	3	99	99	99	99	99	99	99	99	99	99	2	1	1	2	1	1
31	1	0	2	1	2	1	1	1	1	4	2	1	1	2	1	1	1	1	2	1	1	2	1	2	2	2	2	2	2	2	1	99	5	1	2	2	1	1	2	1	2	2	1	1	1	2	1	2	2
31	1	0	2	5	4	1	1	1	1	4	2	1	1	2	1	1	1	1	2	1	1	2	1	2	2	2	2	2	2	2	1	99	5	1	2	2	1	1	2	1	2	2	1	1	1	2	1	2	2
31	1	0	2	1	3	3	1	1	1	4	2	1	1	2	1	1	1	1	2	1	1	2	1	2	2	2	2	2	2	2	1	99	5	1	2	2	1	1	2	1	2	2	1	1	1	2	1	2	2
31	1	0	2	1	3	1	1	1	1	4	2	1	1	2	1	1	1	1	4	99	1	2	1	2	2	2	2	2	2	2	1	99	5	1	2	2	1	1	2	1	2	2	1	1	1	2	1	2	2
31	1	0	2	1	3	1	1	1	1	4	2	1	1	2	1	1	1	1	2	1	1	2	1	2	2	2	2	2	2	2	1	99	5	1	2	2	1	1	2	1	2	2	1	1	1	2	1	2	2
31	1	0	2	1	3	2	1	1	1	4	2	1	1	2	1	1	1	1	4	99	1	2	1	2	2	2	2	2	2	2	1	99	5	1	2	2	1	1	2	1	2	2	1	1	1	2	1	2	2
36	1	0	2	1	3	1	2	6	1	6	2	2	1	2	2	1	1	1	4	99	99	99	1	2	2	2	2	2	2	2	1	1	1	99	99	99	99	99	99	99	99	99	99	1	1	2	2	1	2
36	1	0	2	2	3	2	2	6	1	6	2	2	1	2	1	1	1	1	1	1	1	1	1	2	2	2	2	2	2	2	1	1	1	99	99	99	99	99	99	99	99	99	99	1	1	2	2	1	2
[truncated: 170 more columns]
